# Supplementary material for: Rapid 16S rRNA Next-Generation Sequencing of Polymicrobial Clinical Samples for Diagnosis of Complex Bacterial Infections
Source: PLoS One. 2013 May 29;8(5):e65226. doi: 10.1371/journal.pone.0065226 (PMC3666980; doi:10.1371/journal.pone.0065226)
Supplement: Dataset S1 — Classification results for clinical specimens. (XLSX) [file pone.0065226.s001.xlsx]

## Sheet: Sheet1
1.1 brain1
clinical workup
result_type	reported_result	lab notes
sanger	No diagnosis (multiple templates)
Blast against all of RDP
species	pct_reads	reads	clusters	max_percent	min_percent
Streptococcus constellatus/intermedius	36.86	11269	5	99.69	99.07
no match	34.43	10526	29
Porphyromonas endodontalis	28.55	8728	11	99.68	99.05
Streptococcus constellatus	0.17	52	2	99.08	99.07
1.2 brain2
clinical workup
result_type	reported_result	lab notes
sanger	No diagnosis (multiple templates)
Blast against all of RDP
species	pct_reads	reads	clusters	max_percent	min_percent
Staphylococcus epidermidis	99.01	6874	9	99.68	99.01
Comamonas testosteroni*	0.69	48	1	100	99.31
no match	0.3	21	1
1.3 brain3
clinical workup
result_type	reported_result	lab notes
sanger	No diagnosis (multiple templates)
Blast against all of RDP
species	pct_reads	reads	clusters	max_percent	min_percent
no match	44.44	6155	33
Prevotella oris	31.62	4379	4	99.37	99.05
Porphyromonas endodontalis	15.6	2161	3	99.68	99.37
Streptococcus constellatus/intermedius	6.28	870	1	99.69	99.08
Peptostreptococcus stomatis	2.06	286	2	99.41	99.12
1.4 brain4
clinical workup
result_type	reported_result	lab notes
sanger	No diagnosis (multiple templates)
Blast against all of RDP
species	pct_reads	reads	clusters	max_percent	min_percent
no match	64.12	11410	24
Porphyromonas endodontalis	25.06	4459	12	99.68	99.05
Streptococcus constellatus/intermedius	10.71	1905	2	99.69	99.07
Streptococcus constellatus	0.12	21	1	99.08	99.08
1.5 lymphnode
clinical workup
result_type	reported_result	lab notes
sanger	Velionella species
Blast against all of RDP
species	pct_reads	reads	clusters	max_percent	min_percent
Veillonella parvula/dispar/atypica	23.6	2742	1	99.7	99.05
no match	22.36	2599	17
Fusobacterium periodonticum*	17.16	1994	2	100	99.32
Veillonella dispar/parvula*/denticariosi	10.55	1226	3	100	99.07
Streptococcus oralis	5.65	657	2	99.36	99.36
Prevotella nanceiensis*	5.22	607	3	100	99.04
Campylobacter concisus	2.95	343	1	99.03	99
Streptococcus parasanguinis	2.62	304	1	99.68	99.05
Peptostreptococcus stomatis	2.36	274	1	99.71	99.41
Streptococcus salivarius/vestibularis/thermophilus	2	232	1	99.68	99.05
Veillonella dispar*/parvula*	1.59	185	2	100	99.07
Streptococcus pseudopneumoniae/pneumoniae/mitis/oralis	0.69	80	2	99.68	99.03
Rothia mucilaginosa	0.64	74	1	99.68	99.04
Haemophilus parainfluenzae	0.46	54	1	99.36	99.04
Gemella haemolysans	0.31	36	1	99.69	99.69
Streptococcus constellatus*/intermedius	0.31	36	1	100	99.38
Oribacterium sinus	0.25	29	1	99.69	99.69
Veillonella atypica	0.24	28	1	99.69	99.69
Gemella sanguinis	0.22	25	1	99.69	99.69
Fusobacterium periodonticum/nucleatum	0.22	25	1	99.66	99.32
Capnocytophaga sputigena	0.22	25	1	99.67	99.02
Prevotella melaninogenica	0.2	23	1	99.68	99.05
Streptococcus infantis	0.2	23	1	99.05	99.05
2 CF specimens
2.2.1 CF2
clinical workup
result_type	reported_result	lab notes
culture	4+ Contaminating oro-pharyngeal flora
culture	2+ Achromobacter xylosoxidans
culture	4+ Staphylococcus aureus
sanger	No diagnosis (multiple templates)
BLAST against "clean" CF pathogens database
species	pct_reads	reads	clusters	max_percent	min_percent
Stenotrophomonas maltophilia*	43.07	32192	16	100	99
Staphylococcus aureus*	27.88	20834	14	100	99.05
no match	17.62	13170	47
Achromobacter xylosoxidans*	4.18	3125	3	100	99
Streptococcus mitis	3.07	2296	4	99.36	99.03
Streptococcus infantis	2.25	1680	2	99.68	99.05
Streptococcus salivarius*	0.93	695	1	100	99.04
Streptococcus gordonii	0.3	224	2	99.69	99.38
Streptococcus pneumoniae/mitis	0.26	195	3	99.68	99.04
Streptococcus anginosus	0.17	130	1	99.69	99.69
Streptococcus parasanguinis	0.16	117	1	99.05	99.05
Streptococcus sanguinis	0.11	81	1	99.68	99.37
BLAST against "clean" CF pathogens database including clusters < 20
species	pct_reads	reads	clusters	max_percent	min_percent
Stenotrophomonas maltophilia*	42.88	32674	56	100	99
Staphylococcus aureus*	27.74	21135	38	100	99.05
no match	18.06	13760	93
Achromobacter xylosoxidans*	4.16	3168	6	100	99
Streptococcus mitis	3.01	2296	4	99.36	99.03
Streptococcus infantis	2.24	1704	4	99.68	99.05
Streptococcus salivarius*	0.91	695	1	100	99.04
Streptococcus gordonii	0.29	224	2	99.69	99.38
Streptococcus pneumoniae/mitis	0.26	195	3	99.68	99.04
Streptococcus anginosus	0.19	143	2	99.69	99.07
Streptococcus parasanguinis	0.15	117	1	99.05	99.05
Streptococcus sanguinis	0.11	81	1	99.68	99.37
BLAST against all of RDP
species	pct_reads	reads	clusters	max_percent	min_percent
Pseudoxanthomonas broegbernensis;Pseudomonas geniculata/hibiscicola*;Xanthomonas retroflexus;Stenotrophomonas maltophilia*/pavanii*	39.36	30666	2	100	98.02
Staphylococcus aureus*	27.18	21177	41	100	98.11
no match	5.63	4386	32
Streptococcus pneumoniae/mitis	4.09	3187	3	99.04	98.09
Achromobacter spanius/xylosoxidans*/denitrificans*/insolitus*/ruhlandii	3.84	2994	4	100	98.02
Streptococcus pseudopneumoniae/pneumoniae/mitis/oralis	3.12	2433	6	99.68	98.05
Pseudoxanthomonas broegbernensis;Pseudomonas hibiscicola;Stenotrophomonas pavanii/maltophilia	2.45	1910	47	99.68	98.01
Streptococcus infantis	2.19	1704	4	99.68	98.01
Granulicatella adiacens*/para-adiacens*	1.67	1304	5	100	98.13
Streptococcus parasanguinis	1.13	880	5	99.68	98.1
Prevotella oris	1.03	804	9	99.68	98.1
Streptococcus salivarius*/vestibularis/thermophilus	0.89	695	1	100	99.37
Porphyromonas catoniae	0.78	604	2	98.11	98.11
Veillonella atypica*/dispar/parvula	0.63	491	1	100	98.17
Rothia dentocariosa/mucilaginosa	0.57	445	1	99.36	98.07
Prevotella pallens*	0.56	437	3	100	98.41
Prevotella histicola*	0.55	428	2	100	98.74
Prevotella scopos/melaninogenica*	0.49	378	2	100	98.42
Peptostreptococcus anaerobius*	0.44	341	2	100	99.36
Pseudomonas hibiscicola;Stenotrophomonas pavanii/maltophilia	0.4	315	20	99.04	98
Streptococcus australis	0.38	298	2	99.01	98.03
Streptococcus oralis	0.36	281	2	99.68	98.06
Streptococcus gordonii	0.29	224	2	99.69	98.08
Achromobacter spanius/xylosoxidans/denitrificans/insolitus	0.25	197	3	99.35	98.03
Veillonella dispar*/parvula*/denticariosi	0.25	195	1	100	98.14
Streptococcus mitis	0.25	195	7	98.73	98.06
Oribacterium sinus*	0.2	154	2	100	99.38
Streptococcus anginosus	0.18	143	2	99.69	98.46
Gemella sanguinis*	0.15	117	1	100	100
Gemella haemolysans*	0.13	103	1	100	100
Prevotella timonensis	0.12	91	1	99.68	99.37
Streptococcus sanguinis	0.1	81	1	99.68	98.1
Veillonella parvula/dispar/atypica/denticariosi	0.08	60	1	99.39	98.11
Granulicatella elegans	0.07	52	1	98.43	98.39
Eikenella corrodens*	0.05	41	1	100	99.68
Rothia dentocariosa	0.04	31	1	99.68	99.36
Achromobacter xylosoxidans/denitrificans/insolitus	0.03	22	1	98.03	98
Peptococcus niger	0.01	11	1	98.8	98.8
Stenotrophomonas maltophilia	0.01	10	1	98.69	98
Solobacterium moorei*	0.01	10	1	100	98.39
Veillonella atypica/parvula	0.01	10	1	99.38	98.11
2.2.2 CF4
clinical workup
result_type	reported_result	lab notes
culture	One colony Klebsiella pneumoniae
culture	4+ Contaminating oro-pharyngeal flora
sanger	No diagnosis (multiple templates)
BLAST against "clean" CF pathogens database
species	pct_reads	reads	clusters	max_percent	min_percent
no match	62.28	22585	34
Streptococcus pneumoniae/mitis	14.85	5385	1	99.36	99.04
Streptococcus infantis	11.27	4087	1	99.05	99.05
Streptococcus salivarius*	6.3	2286	2	100	99.04
Streptococcus parasanguinis	4.92	1785	2	99.05	99.05
Streptococcus mitis	0.25	92	2	99.68	99.03
Streptococcus constellatus/intermedius	0.12	42	1	99.69	99.69
BLAST against "clean" CF pathogens database including clusters < 20
species	pct_reads	reads	clusters	max_percent	min_percent
no match	62.57	23051	71
Streptococcus pneumoniae/mitis	14.62	5385	1	99.36	99.04
Streptococcus infantis	11.09	4087	1	99.05	99.05
Streptococcus salivarius*	6.27	2311	4	100	99.04
Streptococcus parasanguinis	4.91	1808	4	99.37	99.05
Streptococcus mitis	0.43	159	8	99.68	99.03
Streptococcus constellatus/intermedius	0.11	42	1	99.69	99.69
BLAST against all of RDP
species	pct_reads	reads	clusters	max_percent	min_percent
Streptococcus infantis	27.33	11433	6	99.05	98.01
Streptococcus pseudopneumoniae/pneumoniae/mitis/oralis	13.28	5555	10	99.68	98.05
Streptococcus mitis/oralis	7.96	3330	2	99.36	98.09
Prevotella histicola	6.72	2811	5	99.37	98.11
no match	6.61	2767	24
Streptococcus salivarius*/vestibularis/thermophilus	5.52	2311	4	100	98.42
Streptococcus parasanguinis*	4.94	2066	8	100	98.1
Granulicatella adiacens*/para-adiacens*	4.88	2043	7	100	98.11
Prevotella oris	3.81	1592	8	99.37	98.11
Streptococcus pneumoniae/mitis	3.76	1572	1	98.41	98.09
Streptococcus oralis	3.29	1375	4	98.73	98.41
Veillonella parvula*/dispar/atypica/denticariosi	3.22	1345	5	100	98.11
Rothia mucilaginosa*	3.1	1297	3	100	98.4
Veillonella atypica*/dispar/parvula	2.75	1149	3	100	98.15
Veillonella dispar/parvula	0.84	351	2	99.7	98.14
Lactobacillus fermentum*	0.34	143	3	100	98.21
Fusobacterium canifelinum/nucleatum	0.28	116	2	99.68	98.06
Campylobacter concisus	0.24	101	1	99.03	98.38
Gemella sanguinis*	0.24	100	1	100	100
Campylobacter gracilis	0.2	82	1	99.68	99.33
Lactobacillus delbrueckii*	0.1	43	1	100	98.48
Streptococcus constellatus/intermedius	0.1	42	1	99.69	98.74
Mycoplasma salivarium*	0.1	40	1	100	100
Treponema socranskii	0.07	28	1	99.67	98.05
Veillonella atypica	0.06	26	1	99.07	99.07
Shuttleworthia satelles*	0.05	22	1	100	99.69
Lactobacillus vaginalis	0.05	21	1	99.71	98.5
Lactobacillus gasseri/taiwanensis/johnsonii	0.04	16	1	99.41	98.18
Lactobacillus casei*/rhamnosus*/paracasei*	0.03	14	1	100	99.4
Lactobacillus casei/rhamnosus	0.03	12	1	99.7	98.22
Fusobacterium nucleatum	0.03	11	1	98.71	98.71
[Eubacterium] yurii	0.03	11	1	98.77	98.77
Phocaeicola abscessus	0.02	10	1	99.37	99.37
2.2.3 CF5
clinical workup
result_type	reported_result	lab notes
culture	4+ Achromobacter xylosoxidans	(formerly Alcaligenes xylosoxidans)
culture	3+ Serratia marcescens
culture	2+ Pseudomonas fluorescens group	: identification by sequence analysis .
culture	4+ Achromobacter species
culture	4+ Contaminating oro-pharyngeal flora
sanger	Achromobacter xylosoxidans
BLAST against "clean" CF pathogens database
species	pct_reads	reads	clusters	max_percent	min_percent
Achromobacter xylosoxidans*	95.78	50844	27	100	99
no match	3.17	1681	21
Streptococcus intermedius*	0.62	330	2	100	99.07
Streptococcus salivarius*	0.39	206	1	100	99.04
Streptococcus pneumoniae/mitis	0.04	23	1	99.68	99.04
BLAST against "clean" CF pathogens database including clusters < 20
species	pct_reads	reads	clusters	max_percent	min_percent
Achromobacter xylosoxidans*	95.14	51396	71	100	99
no match	3.83	2067	51
Streptococcus intermedius*	0.61	330	2	100	99.07
Streptococcus salivarius*	0.38	206	1	100	99.04
Streptococcus pneumoniae/mitis	0.04	23	1	99.68	99.04
BLAST against all of RDP
species	pct_reads	reads	clusters	max_percent	min_percent
Achromobacter spanius/xylosoxidans*/denitrificans*/insolitus*/ruhlandii	87.09	47800	34	100	98.02
Achromobacter spanius/xylosoxidans/denitrificans/insolitus	7.54	4137	50	99.35	98
Prevotella bivia*	1.22	668	2	100	99.68
Streptococcus parasanguinis*	0.62	341	3	100	98.1
no match	0.6	331	10
Streptococcus constellatus/intermedius*	0.6	330	2	100	98.15
Achromobacter xylosoxidans/denitrificans/insolitus	0.58	318	16	98.38	98.01
Streptococcus salivarius*/vestibularis/thermophilus	0.38	206	1	100	99.37
Veillonella dispar*/parvula*/denticariosi	0.19	107	2	100	98.14
Streptococcus sanguinis	0.19	104	1	98.11	98.1
Prevotella histicola*	0.19	103	1	100	99.37
Rothia dentocariosa/mucilaginosa	0.19	102	1	99.68	98.07
Granulicatella adiacens*/para-adiacens*	0.17	91	2	100	98.11
Oribacterium sinus	0.15	83	1	99.38	99.38
Prevotella scopos/melaninogenica	0.06	34	1	99.68	98.42
Fusobacterium periodonticum/nucleatum*	0.05	28	1	100	98.31
Streptococcus pseudopneumoniae/pneumoniae/mitis/oralis	0.04	23	1	99.68	98.05
Veillonella parvula/dispar/atypica/denticariosi/tobetsuensis	0.04	21	1	99.39	98.14
Streptococcus oralis	0.04	20	1	99.68	99.68
Prevotella nanceiensis	0.03	19	1	99.68	99.04
Achromobacter spanius/xylosoxidans/piechaudii/denitrificans/insolitus	0.03	18	1	99.66	98.04
2.2.4 CF6
clinical workup
result_type	reported_result	lab notes
culture	3+ Staphylococcus aureus, coagulase positive
culture	4+ Contaminating oro-pharyngeal flora
sanger	No diagnosis (multiple templates)
BLAST against "clean" CF pathogens database
species	pct_reads	reads	clusters	max_percent	min_percent
no match	72.09	29797	88
Streptococcus salivarius*	11.04	4563	4	100	99.04
Streptococcus parasanguinis*	8.16	3374	4	100	99.05
Streptococcus pneumoniae/mitis	3.01	1244	5	99.68	99.02
Streptococcus intermedius	2.37	979	1	99.69	99.68
Staphylococcus aureus	1.22	505	1	99.68	99.37
Streptococcus mitis	0.67	275	3	99.36	99.03
Streptococcus sanguinis	0.61	252	1	99.68	99.37
Pseudomonas aeruginosa*	0.37	154	1	100	100
Streptococcus agalactiae	0.21	86	1	99.68	99.04
Haemophilus parainfluenzae	0.11	47	1	99.36	99.04
Streptococcus infantis	0.09	36	1	99.37	99.37
Stenotrophomonas maltophilia*	0.05	22	1	100	99
BLAST against "clean" CF pathogens database including clusters < 20
species	pct_reads	reads	clusters	max_percent	min_percent
no match	72.23	30436	140
Streptococcus salivarius*	11	4636	10	100	99.04
Streptococcus parasanguinis*	8.01	3374	4	100	99.05
Streptococcus pneumoniae/mitis*	2.98	1254	6	100	99.02
Streptococcus intermedius	2.35	990	2	99.69	99.68
Staphylococcus aureus	1.2	505	1	99.68	99.37
Streptococcus mitis	0.74	310	5	99.36	99.02
Streptococcus sanguinis	0.6	252	1	99.68	99.37
Pseudomonas aeruginosa*	0.37	154	1	100	100
Streptococcus agalactiae	0.2	86	1	99.68	99.04
Haemophilus parainfluenzae	0.11	47	1	99.36	99.04
Streptococcus infantis	0.09	36	1	99.37	99.37
Stenotrophomonas maltophilia*	0.05	22	1	100	99
Achromobacter xylosoxidans*	0.05	19	1	100	99.01
Streptococcus constellatus/intermedius	0.03	14	1	99.69	99.05
BLAST against all of RDP
species	pct_reads	reads	clusters	max_percent	min_percent
Streptococcus parasanguinis*	19.28	11041	26	100	98
Prevotella histicola*	14.47	8289	17	100	98.11
Veillonella parvula/dispar/atypica/denticariosi	10.44	5979	17	99.7	98.11
no match	10.43	5976	43
Streptococcus salivarius*/vestibularis/thermophilus	8.09	4636	10	100	98.42
Granulicatella adiacens*/para-adiacens*	6.24	3575	8	100	98.12
Prevotella scopos/melaninogenica*	4.04	2315	4	100	98.11
Prevotella pallens*	2.83	1620	7	100	98.1
Streptococcus pseudopneumoniae/pneumoniae/mitis*/oralis	2.63	1504	11	100	98.05
Streptococcus oralis	2.47	1413	3	99.68	98.06
Prevotella salivae	1.78	1018	4	99.37	98.73
Streptococcus constellatus/intermedius	1.75	1004	3	99.69	98.15
Gemella sanguinis*	1.7	974	2	100	99.38
Prevotella oris	1.45	830	5	99.68	98.42
Megasphaera micronuciformis*	1.27	728	3	100	99.1
Campylobacter concisus*	1.16	664	2	100	98.3
Rothia mucilaginosa*	1.02	587	1	100	98.71
Streptococcus infantis	1.01	578	2	98.73	98.01
Oribacterium sinus*	1	572	6	100	98.14
Prevotella oulorum	0.9	514	1	99.37	98.43
Staphylococcus aureus	0.88	505	1	99.68	99.37
Prevotella nanceiensis*	0.57	325	2	100	98.73
Veillonella parvula/dispar/atypica/denticariosi/tobetsuensis	0.52	296	3	99.68	98.14
Streptococcus sanguinis	0.5	286	2	99.68	98.1
Actinomyces graevenitzii	0.45	258	4	99.67	98.35
Atopobium vaginae*	0.43	249	1	100	100
Solobacterium moorei*	0.36	209	1	100	98.39
Pseudomonas aeruginosa*	0.27	154	1	100	100
Peptostreptococcus stomatis	0.25	146	2	99.71	99.41
Streptococcus mitis/oralis	0.22	127	2	99.36	98.06
Gemella haemolysans	0.16	91	3	99.69	98.75
Streptococcus infantis/oralis	0.16	91	3	99.37	98.09
Streptococcus agalactiae	0.15	86	1	99.68	98.04
Catonella morbi	0.15	86	1	99.08	98.78
Veillonella dispar*/parvula*/denticariosi	0.12	68	1	100	98.14
Streptococcus australis	0.1	60	1	98.42	98.36
Haemophilus parainfluenzae	0.1	57	2	99.36	98.08
Rothia dentocariosa	0.09	52	1	99.68	99.36
Streptococcus pneumoniae/mitis	0.08	48	2	98.73	98.1
Veillonella parvula/dispar/atypica	0.07	42	3	99.37	98.14
Atopobium parvulum	0.07	38	1	99.02	99.02
Campylobacter showae	0.07	38	1	99.02	98.99
Veillonella parvula/atypica	0.06	34	1	98.75	98.17
Eubacterium saburreum	0.05	30	2	98.15	98.15
Pseudoxanthomonas broegbernensis;Pseudomonas geniculata/hibiscicola*;Xanthomonas retroflexus;Stenotrophomonas maltophilia*/pavanii*	0.04	22	1	100	98.04
Achromobacter spanius/xylosoxidans*/denitrificans*/insolitus*/ruhlandii	0.03	19	1	100	98.03
Streptococcus mitis/cristatus	0.02	13	1	98.73	98.09
Streptococcus intermedius	0.02	11	1	98.46	98.11
Veillonella parvula	0.02	10	1	98.49	98.43
Prevotella melaninogenica	0.02	10	1	99.06	98.43
2.2.5 CF8
clinical workup
result_type	reported_result	lab notes
culture	4+ Presumptive mucoid Pseudomonas aeruginosa
culture	4+ Presumptive mucoid Pseudomonas aeruginosa colony type No.2
culture	4+ Contaminating oro-pharyngeal flora
sanger	No diagnosis (multiple templates)
BLAST against "clean" CF pathogens database
species	pct_reads	reads	clusters	max_percent	min_percent
Pseudomonas aeruginosa*	61.67	50581	31	100	99.02
Streptococcus salivarius*	17.34	14225	5	100	99.04
no match	16.07	13183	70
Streptococcus pneumoniae/mitis	2.36	1932	4	99.68	99.02
Streptococcus sanguinis	0.99	814	2	99.68	99.05
Streptococcus intermedius*	0.47	384	2	100	99.07
Streptococcus infantis	0.39	321	3	99.36	99.04
Streptococcus mitis	0.28	232	4	99.68	99.03
Streptococcus parasanguinis	0.21	169	2	99.05	99.05
Streptococcus australis	0.14	118	1	99.05	99.05
Haemophilus parainfluenzae*	0.07	61	1	100	99.04
BLAST against "clean" CF pathogens database including clusters < 20
species	pct_reads	reads	clusters	max_percent	min_percent
Pseudomonas aeruginosa*	61.38	51440	97	100	99.02
Streptococcus salivarius*	17.35	14539	31	100	99.03
no match	16.38	13723	112
Streptococcus pneumoniae/mitis*	2.32	1943	5	100	99.02
Streptococcus sanguinis	0.99	833	3	99.68	99.05
Streptococcus intermedius*	0.46	384	2	100	99.07
Streptococcus infantis	0.38	321	3	99.36	99.04
Streptococcus mitis	0.31	257	6	99.68	99.03
Streptococcus parasanguinis	0.22	182	3	99.37	99.05
Streptococcus australis	0.14	118	1	99.05	99.05
Haemophilus parainfluenzae*	0.07	61	1	100	99.04
BLAST against all of RDP
species	pct_reads	reads	clusters	max_percent	min_percent
Pseudomonas aeruginosa*	60.77	51780	112	100	98.05
Streptococcus salivarius*/vestibularis/thermophilus	17.05	14528	30	100	98.11
no match	4.75	4047	37
Streptococcus pseudopneumoniae/pneumoniae/mitis*/oralis	2.45	2090	11	100	98.05
Streptococcus parasanguinis	2.18	1854	7	99.68	98.05
Granulicatella adiacens*/para-adiacens*	1.96	1674	4	100	98.13
Streptococcus infantis	1.49	1270	6	99.05	98
Streptococcus sanguinis	1.08	922	5	99.68	98.1
Streptococcus infantis/oralis	0.96	817	4	99.36	98.09
Streptococcus pneumoniae/mitis	0.93	792	5	99.68	98.09
Rothia dentocariosa/mucilaginosa	0.72	612	1	99.68	98.07
Veillonella atypica*/dispar/parvula	0.67	573	3	100	98.15
Prevotella scopos/melaninogenica*	0.65	557	2	100	98.11
Streptococcus constellatus/intermedius*	0.45	384	2	100	98.15
Streptococcus australis	0.35	295	2	99.05	98.68
Veillonella parvula/dispar/atypica/denticariosi	0.34	291	2	99.7	98.11
Streptococcus pneumoniae	0.27	232	1	98.09	98.09
Campylobacter concisus	0.23	193	2	99.67	98.3
Fusobacterium nucleatum*	0.21	176	1	100	98.26
Prevotella pallens*	0.19	165	2	100	98.41
Streptococcus mitis	0.19	160	4	99.68	98.09
Fusobacterium periodonticum*/nucleatum	0.19	160	1	100	98.31
Catonella morbi	0.18	154	1	98.78	98.47
Gemella sanguinis*	0.15	132	1	100	100
Prevotella oris	0.15	131	1	99.37	99.05
Megasphaera micronuciformis*	0.13	113	1	100	99.7
Streptococcus mitis/oralis	0.12	100	1	98.73	98.06
Neisseria oralis	0.11	91	1	99.68	99.68
Prevotella nigrescens*	0.1	86	2	100	98.43
Prevotella nanceiensis*	0.1	85	1	100	99.36
Prevotella loescheii;Candidatus Prevotella conceptionensis	0.09	75	2	99.05	98.1
Oribacterium sinus*	0.09	73	3	100	98.14
Streptococcus mitis/infantis/oralis	0.08	68	1	99.68	98.09
Granulicatella elegans	0.08	66	1	99.35	98.12
Haemophilus parainfluenzae*	0.07	61	1	100	98.08
Gemella haemolysans	0.06	53	1	99.06	99.06
[Eubacterium] yurii	0.05	40	1	99.38	99.38
Dialister invisus*	0.04	33	1	100	98.2
Streptococcus salivarius/thermophilus	0.03	29	2	99.68	98.41
Prevotella salivae	0.03	26	1	99.68	99.68
Prevotella tannerae	0.03	24	1	99.37	98.42
Tannerella forsythia	0.03	23	1	98.72	98.07
Solobacterium moorei*	0.03	23	1	100	98.39
Rothia dentocariosa	0.03	23	1	99.68	99.36
Veillonella dispar*/parvula*/denticariosi	0.02	21	1	100	98.14
Atopobium parvulum	0.02	20	1	99.67	99.67
Campylobacter showae	0.02	18	1	99.67	98.99
Eikenella corrodens	0.02	18	1	99.67	99.36
Curvibacter delicatus/gracilis/lanceolatus;Aquamonas fontana	0.01	12	1	99.67	98.36
Cupriavidus metallidurans	0.01	11	1	98.05	98.02
Rhodanobacter thiooxydans	0.01	11	1	99.04	99.04
Veillonella atypica/parvula	0.01	10	1	99.38	98.11
Rothia mucilaginosa	0.01	10	1	98.72	98.08
2.2.6 CF10
clinical workup
result_type	reported_result	lab notes
culture	3+ Staphylococcus aureus, coagulase positive
culture	2+ mucoid Presumptive Pseudomonas aeruginosa
sanger	No diagnosis (multiple templates)
BLAST against "clean" CF pathogens database
species	pct_reads	reads	clusters	max_percent	min_percent
Pseudomonas aeruginosa*	40.88	13618	6	100	99.02
Staphylococcus aureus*	34.41	11464	8	100	99.05
no match	24.71	8230	23
BLAST against "clean" CF pathogens database including clusters < 20
species	pct_reads	reads	clusters	max_percent	min_percent
Pseudomonas aeruginosa*	40.56	13739	16	100	99.02
Staphylococcus aureus*	34.21	11588	16	100	99.05
no match	25.23	8544	47
BLAST against all of RDP
species	pct_reads	reads	clusters	max_percent	min_percent
Pseudomonas aeruginosa*	30.13	13801	21	100	98.03
Staphylococcus aureus*	25.3	11588	16	100	98.42
Prevotella scopos/melaninogenica*	22.88	10477	18	100	98.11
Granulicatella adiacens*/para-adiacens*	9.44	4322	9	100	98.12
no match	3.68	1687	25
Gemella sanguinis*	2.67	1225	3	100	98.76
Oribacterium sinus	1.71	784	3	99.69	98.45
Prevotella melaninogenica	1.41	647	15	99.37	98.11
Solobacterium moorei	1.24	566	2	99.68	98.07
Abiotrophia defectiva	0.66	302	2	99.38	98.14
Shuttleworthia satelles*	0.31	144	1	100	99.69
Prevotella histicola*	0.22	101	1	100	99.37
Capnocytophaga leadbetteri	0.12	57	1	98.66	98.66
Eubacterium saburreum	0.08	37	1	98.46	98.46
Peptostreptococcus stomatis	0.06	29	1	99.71	99.41
Veillonella dispar/parvula/denticariosi	0.04	18	1	99.09	98.16
Treponema vincentii*	0.03	15	1	100	99.37
2.2.7 CF11
clinical workup
result_type	reported_result	lab notes
culture	4+ Contaminating oro-pharyngeal flora
sanger	No diagnosis (multiple templates)
BLAST against "clean" CF pathogens database
species	pct_reads	reads	clusters	max_percent	min_percent
no match	88.56	24721	69
Streptococcus salivarius*	4.53	1264	4	100	99.04
Streptococcus parasanguinis	3	838	4	99.37	99.05
Haemophilus parainfluenzae*	1.81	506	3	100	99.04
Streptococcus pneumoniae/mitis	1.54	430	1	99.68	99.02
Streptococcus mitis	0.33	92	2	99.37	99.03
Pseudomonas aeruginosa*	0.12	34	1	100	100
Streptococcus gordonii	0.11	30	1	99.38	99.38
BLAST against "clean" CF pathogens database including clusters < 20
species	pct_reads	reads	clusters	max_percent	min_percent
no match	88.63	25467	127
Streptococcus salivarius*	4.47	1285	6	100	99.04
Streptococcus parasanguinis	2.92	838	4	99.37	99.05
Haemophilus parainfluenzae*	1.86	533	5	100	99.04
Streptococcus pneumoniae/mitis	1.53	440	2	99.68	99.02
Streptococcus mitis	0.32	92	2	99.37	99.03
Pseudomonas aeruginosa*	0.12	34	1	100	100
Streptococcus gordonii	0.1	30	1	99.38	99.38
Streptococcus intermedius*	0.05	14	1	100	99.07
BLAST against all of RDP
species	pct_reads	reads	clusters	max_percent	min_percent
Streptococcus parasanguinis	17.26	6360	17	99.68	98.05
Streptococcus oralis	10.9	4017	18	99.68	98.1
no match	10.53	3881	48
Prevotella scopos/melaninogenica*	9.6	3540	6	100	98.12
Gemella sanguinis*	8.2	3024	6	100	99.07
Prevotella histicola	7.3	2691	5	99.37	98.12
Veillonella parvula/dispar/atypica/denticariosi	4.8	1770	2	99.7	98.11
Leptotrichia wadei	4.7	1731	3	98.04	98.04
Veillonella atypica*/dispar/parvula	3.89	1432	3	100	98.15
Granulicatella adiacens*/para-adiacens*	3.32	1224	5	100	98.12
Streptococcus salivarius*/vestibularis/thermophilus	3.22	1185	5	100	98.08
Rothia dentocariosa/mucilaginosa	2.19	807	1	99.68	98.07
Campylobacter concisus	1.57	578	4	99.66	98.06
Prevotella salivae	1.5	551	2	99.05	98.73
Haemophilus parainfluenzae*	1.45	533	5	100	98.08
Streptococcus pseudopneumoniae/pneumoniae/mitis/oralis	1.44	532	4	99.68	98.08
Prevotella nanceiensis*	1.31	481	3	100	99.04
Pasteurella multocida*	1.04	382	3	100	98.09
Oribacterium sinus*	1.03	379	4	100	98.14
Actinomyces graevenitzii	0.96	352	4	99.67	99.02
Megasphaera micronuciformis*	0.73	268	2	100	99.4
Gemella haemolysans*	0.36	132	3	100	98.75
Fusobacterium periodonticum/nucleatum*	0.34	126	2	100	98.29
Solobacterium moorei	0.33	120	2	99.68	98.07
Eubacterium saburreum	0.27	101	2	98.15	98.15
Streptococcus salivarius/vestibularis	0.27	100	1	99.05	98.1
Prevotella melaninogenica	0.22	80	6	99.37	98.03
Streptococcus infantis	0.18	66	1	98.42	98.42
Atopobium parvulum	0.15	57	2	99.35	99.35
Veillonella dispar/parvula*/denticariosi	0.14	51	3	100	98.14
Catonella morbi	0.12	43	1	99.08	98.78
Prevotella nigrescens*	0.11	42	1	100	99.05
Prevotella oris	0.11	39	1	99.37	99.05
Pseudomonas aeruginosa*	0.09	34	1	100	100
Streptococcus gordonii	0.08	30	1	99.38	98.15
Streptococcus mitis/oralis*	0.08	29	2	100	98.09
Rothia mucilaginosa	0.07	26	2	99.36	98.39
Streptococcus constellatus/intermedius*	0.04	14	1	100	98.15
Streptococcus cristatus	0.04	13	1	99.68	98.02
Fusobacterium nucleatum	0.03	12	1	99.66	98.26
Veillonella parvula/denticariosi	0.03	12	1	98.2	98.17
Leptotrichia hofstadii	0.03	11	1	98.01	98.01
2.2.9 CF14
clinical workup
result_type	reported_result	lab notes
culture	3+ Presumptive mucoid Pseudomonas aeruginosa colony type No.1
culture	4+ Presumptive mucoid Pseudomonas aeruginosa colony type No.2
culture	3+ Pseudomonas aeruginosa colony type No.3
culture	3+ Pseudomonas aeruginosa colony type No.4
culture	3+ Contaminating oro-pharyngeal flora
sanger	Streptococcus mitis/Streptococcus pneumoniae
BLAST against "clean" CF pathogens database
species	pct_reads	reads	clusters	max_percent	min_percent
Pseudomonas aeruginosa*	33.34	21022	15	100	99.03
Streptococcus pneumoniae/mitis	31.32	19747	4	99.68	99.02
Streptococcus mitis	13.88	8749	10	99.68	99.03
no match	7.8	4916	31
Streptococcus gordonii	5.43	3423	3	99.69	99.38
Streptococcus salivarius*	5.07	3194	4	100	99.04
Stenotrophomonas maltophilia*	3.16	1993	3	100	99
BLAST against "clean" CF pathogens database including clusters < 20
species	pct_reads	reads	clusters	max_percent	min_percent
Pseudomonas aeruginosa*	33.17	21402	44	100	99.02
Streptococcus pneumoniae/mitis*	30.8	19873	14	100	99.02
Streptococcus mitis	14.15	9130	40	99.68	99.02
no match	8.37	5402	69
Streptococcus gordonii	5.39	3478	8	99.69	99.08
Streptococcus salivarius*	4.98	3216	6	100	99.04
Stenotrophomonas maltophilia*	3.15	2030	6	100	99
BLAST against all of RDP
species	pct_reads	reads	clusters	max_percent	min_percent
Streptococcus pseudopneumoniae/pneumoniae/mitis*/oralis	44.96	29121	58	100	98.05
Pseudomonas aeruginosa*	33.22	21518	49	100	98.38
Streptococcus gordonii	5.41	3501	10	99.69	98.08
Streptococcus salivarius*/vestibularis/thermophilus	4.99	3230	7	100	98.1
Streptococcus parasanguinis*	3.28	2123	4	100	98.1
Pseudomonas geniculata/hibiscicola;Xanthomonas retroflexus;Stenotrophomonas pavanii/maltophilia*	2.99	1937	2	100	98.07
Granulicatella adiacens*/para-adiacens*	1.34	871	5	100	98.13
Veillonella dispar*/parvula*/denticariosi	0.69	450	1	100	98.14
no match	0.65	421	22
Veillonella atypica*/dispar/parvula	0.48	311	1	100	98.17
Actinomyces graevenitzii	0.34	220	3	99.67	98.69
Prevotella scopos/melaninogenica*	0.28	184	1	100	98.42
Rothia mucilaginosa	0.28	184	1	99.36	98.71
Lactobacillus fermentum*	0.2	128	3	100	98.24
Atopobium parvulum	0.17	111	1	99.02	99.02
Pseudomonas hibiscicola;Stenotrophomonas pavanii/maltophilia	0.14	93	4	99.68	98.04
Streptococcus mitis	0.13	81	5	98.11	98.09
Prevotella histicola*	0.09	57	1	100	99.37
Gemella haemolysans	0.06	36	1	99.37	99.37
Megasphaera micronuciformis*	0.06	36	1	100	99.7
Veillonella atypica/parvula	0.05	35	2	99.38	98.11
Veillonella parvula/dispar/atypica/denticariosi	0.04	25	1	99.69	98.11
Streptococcus mitis/oralis	0.04	24	1	98.74	98.08
Lactobacillus casei/rhamnosus	0.03	19	1	99.7	98.18
Rothia dentocariosa/mucilaginosa	0.03	19	1	99.68	98.07
Streptococcus oralis	0.02	16	1	99.04	98.41
Rothia dentocariosa	0.02	11	1	99.68	99.36
Stenotrophomonas maltophilia	0.02	10	1	98.41	98
2.2.10 CF15
clinical workup
result_type	reported_result	lab notes
culture	3+ Pseudomonas aeruginosa colony type No.1
culture	3+ Pseudomonas aeruginosa colony type No.3
culture	4+ Contaminating oro-pharyngeal flora
sanger	No diagnosis (multiple templates)
BLAST against "clean" CF pathogens database
species	pct_reads	reads	clusters	max_percent	min_percent
Pseudomonas aeruginosa*	81.21	81050	59	100	99.02
no match	14.04	14010	35
Streptococcus mitis	3.43	3426	3	99.68	99.03
Streptococcus salivarius*	1.22	1218	1	100	99.04
Streptococcus anginosus	0.05	53	1	99.69	99.69
Streptococcus intermedius	0.03	27	1	99.69	99.68
Streptococcus pneumoniae/mitis	0.02	21	1	99.68	99.04
BLAST against "clean" CF pathogens database including clusters < 20
species	pct_reads	reads	clusters	max_percent	min_percent
Pseudomonas aeruginosa*	81.04	81826	123	100	99.02
no match	14.23	14369	66
Streptococcus mitis	3.4	3436	4	99.68	99.03
Streptococcus salivarius*	1.21	1218	1	100	99.04
Streptococcus anginosus	0.06	63	2	99.69	99.07
Streptococcus pneumoniae/mitis*	0.03	33	2	100	99.02
Streptococcus intermedius	0.03	27	1	99.69	99.68
BLAST against all of RDP
species	pct_reads	reads	clusters	max_percent	min_percent
Pseudomonas aeruginosa*	79.68	82138	136	100	98.05
no match	9.57	9862	31
Streptococcus pseudopneumoniae/pneumoniae/mitis*/oralis	3.37	3469	6	100	98.05
Prevotella scopos/melaninogenica*	1.51	1558	4	100	98.42
Streptococcus salivarius*/vestibularis/thermophilus	1.18	1218	1	100	99.37
Rothia dentocariosa/mucilaginosa	0.94	973	1	99.68	98.07
Veillonella atypica*/dispar/parvula	0.61	627	3	100	98.15
Streptococcus mitis	0.47	482	2	99.68	99.37
Prevotella histicola*	0.43	441	1	100	99.37
Oribacterium sinus*	0.39	399	2	100	99.69
Veillonella parvula/dispar/atypica/denticariosi	0.38	394	1	99.7	98.18
Gemella haemolysans	0.35	359	3	99.37	99.06
Streptococcus mitis/cristatus	0.3	307	1	98.41	98.09
Solobacterium moorei	0.19	199	1	99.68	98.07
Veillonella dispar*/parvula*/denticariosi	0.14	148	1	100	98.14
Megasphaera micronuciformis*	0.11	112	1	100	99.7
Atopobium parvulum	0.08	84	1	99.35	99.35
Prevotella salivae	0.07	71	3	99.68	98.73
Streptococcus anginosus	0.06	63	2	99.69	98.46
Rothia dentocariosa	0.06	60	1	99.68	99.36
Prevotella oris	0.04	37	1	99.68	98.73
Rothia mucilaginosa	0.03	36	3	99.36	98.4
Streptococcus constellatus/intermedius	0.03	27	1	99.69	98.15
Streptococcus infantis/oralis	0.01	15	1	99.04	98.1
2.2.11 CF16
clinical workup
result_type	reported_result	lab notes
culture	2+ mucoid Presumptive Pseudomonas aeruginosa colony type No.1
culture	2+ mucoid Presumptive Pseudomonas aeruginosa colony type No.2
culture	3+ Contaminating oro-pharyngeal flora
sanger	Pseudomonas aeruginosa
BLAST against "clean" CF pathogens database
species	pct_reads	reads	clusters	max_percent	min_percent
Pseudomonas aeruginosa*	92.32	43866	18	100	99.02
no match	5.07	2408	24
Streptococcus mitis	1.41	669	3	99.36	99.03
Streptococcus gordonii	0.84	398	2	99.69	99.38
Stenotrophomonas maltophilia*	0.37	176	1	100	99
BLAST against "clean" CF pathogens database including clusters < 20
species	pct_reads	reads	clusters	max_percent	min_percent
Pseudomonas aeruginosa*	92.13	44561	71	100	99.02
no match	5.3	2565	36
Streptococcus mitis	1.38	669	3	99.36	99.03
Streptococcus gordonii	0.82	398	2	99.69	99.38
Stenotrophomonas maltophilia*	0.36	176	1	100	99
BLAST against all of RDP
species	pct_reads	reads	clusters	max_percent	min_percent
Pseudomonas aeruginosa*	91.93	44750	79	100	98.03
no match	1.2	582	12
Porphyromonas catoniae	1.16	566	2	99.68	98.11
Capnocytophaga sputigena*	0.96	467	3	100	98.69
Streptococcus mitis/oralis	0.89	435	1	99.05	98.06
Streptococcus gordonii	0.82	398	2	99.69	98.08
Rothia dentocariosa	0.48	235	1	99.68	99.36
Streptococcus pseudopneumoniae/pneumoniae/mitis/oralis	0.48	234	2	99.36	98.05
Prevotella scopos/melaninogenica*	0.47	227	3	100	98.42
Pseudomonas geniculata/hibiscicola;Xanthomonas retroflexus;Stenotrophomonas pavanii/maltophilia*	0.36	176	1	100	98.07
Veillonella dispar*/parvula*/denticariosi	0.33	163	2	100	98.14
Gemella haemolysans	0.16	76	1	99.37	99.37
Streptococcus infantis	0.15	72	1	98.73	98.01
Corynebacterium durum	0.13	61	1	99.36	98.39
Propionibacterium propionicum	0.09	42	1	99.34	98.7
Eikenella corrodens	0.09	42	1	99.67	99.36
Veillonella parvula*/dispar/atypica/denticariosi	0.08	38	1	100	98.11
Rothia dentocariosa/mucilaginosa	0.08	37	1	99.68	98.07
Prevotella nanceiensis	0.06	31	1	99.68	99.04
Capnocytophaga granulosa/gingivalis	0.04	21	1	99.01	98.02
Gemella sanguinis*	0.03	15	1	100	100
Veillonella atypica*/dispar/parvula	0.02	12	1	100	98.17
2.2.12 CF17
clinical workup
result_type	reported_result	lab notes
culture	4+ Presumptive mucoid Pseudomonas aeruginosa
culture	4+ Pseudomonas aeruginosa
culture	1+ Chryseobacterium species
culture	4+ Staphylococcus aureus, coagulase positive
culture	4+ Contaminating oro-pharyngeal flora
sanger	No diagnosis (multiple templates)
BLAST against "clean" CF pathogens database
species	pct_reads	reads	clusters	max_percent	min_percent
no match	45.85	9797	40
Pseudomonas aeruginosa*	33.17	7088	5	100	99.34
Streptococcus pneumoniae/mitis	12.73	2720	4	99.68	99.04
Streptococcus salivarius*	3.14	670	2	100	99.04
Streptococcus parasanguinis	2.27	486	2	99.68	99.05
Streptococcus infantis	1.18	252	1	99.05	99.05
Streptococcus oralis	0.43	92	1	99.37	99.37
Streptococcus gordonii	0.39	83	1	99.07	99.07
Haemophilus parainfluenzae	0.35	75	2	99.68	99.04
Haemophilus parahaemolyticus	0.28	59	1	99.04	99.04
Streptococcus mitis	0.21	44	2	99.36	99.03
BLAST against "clean" CF pathogens database including clusters < 20
species	pct_reads	reads	clusters	max_percent	min_percent
no match	46.49	10174	70
Pseudomonas aeruginosa*	32.65	7145	10	100	99.02
Streptococcus pneumoniae/mitis	12.48	2731	5	99.68	99.03
Streptococcus salivarius*	3.12	683	3	100	99.04
Streptococcus parasanguinis	2.22	486	2	99.68	99.05
Streptococcus infantis	1.15	252	1	99.05	99.05
Streptococcus mitis	0.44	96	6	99.37	99.03
Streptococcus oralis	0.42	92	1	99.37	99.37
Haemophilus parainfluenzae	0.39	85	3	99.68	99.04
Streptococcus gordonii	0.38	83	1	99.07	99.07
Haemophilus parahaemolyticus	0.27	59	1	99.04	99.04
BLAST against all of RDP
species	pct_reads	reads	clusters	max_percent	min_percent
Pseudomonas aeruginosa*	28.93	7180	12	100	98.06
Granulicatella adiacens*/para-adiacens*	11.74	2915	7	100	98.11
Streptococcus pseudopneumoniae/pneumoniae/mitis/oralis	11.51	2858	12	99.68	98.05
no match	5.68	1411	30
Streptococcus oralis	5.68	1410	4	99.68	98.39
Streptococcus parasanguinis*	4.09	1016	3	100	98.1
Prevotella nanceiensis*	2.92	724	4	100	98.41
Veillonella atypica*/dispar/parvula	2.77	687	3	100	98.15
Streptococcus salivarius*/vestibularis/thermophilus	2.75	683	3	100	98.73
Streptococcus infantis/oralis	2.75	683	2	99.04	98.1
Streptococcus mitis/oralis*	2.73	677	2	100	98.06
Rothia mucilaginosa*	2.72	676	1	100	98.71
Prevotella histicola*	2.07	514	2	100	98.43
Gemella haemolysans*	1.73	430	6	100	98.43
Gemella sanguinis*	1.29	321	2	100	99.69
Prevotella scopos/melaninogenica*	1.22	302	1	100	98.74
Streptococcus infantis	1.06	263	2	99.05	98.1
Prevotella salivae	0.74	184	1	99.37	99.37
Campylobacter concisus	0.69	172	1	99.67	98.3
Prevotella oris*	0.6	148	1	100	99.05
Prevotella timonensis*	0.59	146	2	100	99.37
Bulleidia extructa	0.58	144	1	99.68	98.4
Veillonella parvula/dispar/atypica/denticariosi	0.52	129	2	99.7	98.11
Oribacterium sinus*	0.48	119	2	100	99.07
Megasphaera micronuciformis*	0.45	111	1	100	99.7
Streptococcus sanguinis	0.37	91	1	98.73	98.1
Haemophilus parainfluenzae	0.34	85	3	99.68	98.07
Streptococcus gordonii	0.33	83	1	99.69	98.15
Fusobacterium periodonticum*/nucleatum	0.29	73	1	100	98.31
Veillonella dispar*/parvula*/denticariosi	0.26	65	1	100	98.14
Prevotella veroralis	0.26	64	2	99.68	98.42
Rothia dentocariosa	0.24	59	1	99.68	99.36
Haemophilus parahaemolyticus	0.24	59	1	99.04	98.71
Prevotella tannerae	0.23	57	1	98.74	98.11
Solobacterium moorei	0.19	47	1	99.68	98.07
Catonella morbi	0.18	44	1	99.08	98.78
Peptostreptococcus stomatis*	0.14	34	1	100	99.71
Streptococcus pneumoniae	0.13	33	1	98.09	98.09
Prevotella nigrescens	0.13	32	1	99.69	98.75
Neisseria meningitidis*/cinerea*	0.07	17	1	100	99.03
Actinomyces graevenitzii	0.06	15	1	99.67	99.67
Streptococcus oralis/mitis/infantis/australis	0.05	13	1	99.05	98.03
Veillonella dispar/parvula	0.05	13	1	99.7	98.14
Streptococcus mitis/infantis/oralis	0.05	12	1	98.41	98.09
Rothia dentocariosa/mucilaginosa	0.04	11	1	99.68	98.07
Porphyromonas catoniae	0.04	10	1	98.11	98.11
2.2.13 CF18
clinical workup
result_type	reported_result	lab notes
culture	4+ Presumptive mucoid Pseudomonas aeruginosa colony type No.1
culture	4+ Presumptive mucoid Pseudomonas aeruginosa colony type No.2
culture	4+ Contaminating oro-pharyngeal flora
sanger	No diagnosis (multiple templates)
BLAST against "clean" CF pathogens database
species	pct_reads	reads	clusters	max_percent	min_percent
no match	49.74	20709	88
Pseudomonas aeruginosa*	43.44	18085	12	100	99.01
Streptococcus pneumoniae/mitis	2.85	1185	1	99.68	99.02
Streptococcus parasanguinis	2.14	891	1	99.37	99.05
Streptococcus mitis	0.69	289	2	99.05	99.04
Streptococcus infantis	0.5	210	1	99.05	99.05
Streptococcus salivarius*	0.38	157	1	100	99.04
Streptococcus australis	0.17	71	1	99.37	99.37
Haemophilus parainfluenzae*	0.09	38	1	100	99.04
BLAST against "clean" CF pathogens database including clusters < 20
species	pct_reads	reads	clusters	max_percent	min_percent
no match	50.32	21386	139
Pseudomonas aeruginosa*	42.81	18195	21	100	99.01
Streptococcus pneumoniae/mitis	2.82	1197	2	99.68	99.02
Streptococcus parasanguinis	2.1	891	1	99.37	99.05
Streptococcus mitis	0.74	313	4	99.05	99.03
Streptococcus infantis	0.49	210	1	99.05	99.05
Streptococcus salivarius*	0.37	157	1	100	99.04
Streptococcus australis	0.17	71	1	99.37	99.37
Haemophilus parainfluenzae*	0.09	38	1	100	99.04
Streptococcus gordonii	0.03	14	1	99.69	99.69
Streptococcus sanguinis	0.03	13	1	99.68	99.37
Streptococcus constellatus*/intermedius	0.03	12	1	100	99.38
BLAST against all of RDP
species	pct_reads	reads	clusters	max_percent	min_percent
Pseudomonas aeruginosa*	36.84	18533	28	100	98.05
no match	8.67	4364	48
Prevotella loescheii;Candidatus Prevotella conceptionensis	8.31	4180	3	99.05	98.1
Prevotella scopos/melaninogenica*	7.32	3684	5	100	98.11
Fusobacterium periodonticum*/nucleatum	6.23	3135	5	100	98.26
Streptococcus parasanguinis*	5.17	2603	5	100	98.1
Granulicatella adiacens*/para-adiacens*	4.58	2306	12	100	98.12
Streptococcus pseudopneumoniae/pneumoniae/mitis/oralis	3.02	1521	7	99.68	98.06
Veillonella parvula/dispar/atypica/denticariosi/tobetsuensis	2.2	1106	2	99.68	98.14
Gemella sanguinis*	2.16	1085	1	100	100
Porphyromonas catoniae	1.59	799	2	99.68	98.11
Actinomyces graevenitzii	1.52	766	6	99.67	98.36
Streptococcus oralis	1.19	597	2	99.68	99.04
Rothia mucilaginosa*	1.15	581	1	100	98.71
Streptococcus australis	0.92	464	3	99.67	98.03
Capnocytophaga leadbetteri	0.84	424	2	99.67	98.33
Prevotella nanceiensis*	0.82	413	4	100	99.04
Veillonella tobetsuensis*	0.64	320	4	100	98.19
Prevotella pallens	0.6	300	2	99.68	98.41
Streptococcus infantis	0.48	239	2	99.05	98.33
Oribacterium sinus*	0.45	226	3	100	98.14
Solobacterium moorei*	0.43	214	2	100	98.39
Campylobacter showae	0.36	180	1	99.67	98.99
Fusobacterium nucleatum*	0.33	165	2	100	98.28
Campylobacter concisus*	0.32	161	1	100	98.64
Streptococcus salivarius*/vestibularis/thermophilus	0.31	157	1	100	99.37
Megasphaera micronuciformis*	0.31	154	2	100	99.4
Catonella morbi	0.28	143	1	99.08	98.78
Atopobium parvulum	0.26	130	1	99.35	99.35
Prevotella melaninogenica	0.24	119	5	99.37	98.11
Prevotella loescheii	0.23	116	6	98.42	98.1
Prevotella salivae	0.23	116	1	99.68	99.68
Capnocytophaga sputigena*	0.22	109	1	100	99.34
Gemella haemolysans*	0.17	87	2	100	98.75
Capnocytophaga gingivalis	0.15	75	1	98.02	98.02
Abiotrophia defectiva	0.13	64	1	98.76	98.14
Streptococcus sanguinis	0.13	64	2	99.68	98.1
Veillonella atypica*/dispar/parvula	0.11	57	3	100	98.15
Veillonella parvula/dispar/atypica/denticariosi	0.09	46	1	99.39	98.14
Fusobacterium nucleatum/naviforme	0.09	44	2	99.68	98.06
Veillonella dispar*/parvula*/denticariosi	0.09	43	1	100	98.14
Haemophilus parainfluenzae*	0.08	38	1	100	98.08
Rothia dentocariosa/mucilaginosa	0.07	34	1	99.68	98.07
Campylobacter gracilis*	0.06	31	1	100	99.67
Granulicatella elegans	0.06	28	1	99.37	98.43
Streptococcus pneumoniae/mitis	0.05	27	1	98.41	98.09
Fusobacterium periodonticum	0.05	26	2	98.99	98.32
Dialister invisus	0.05	25	1	99.7	98.2
Corynebacterium durum	0.05	23	1	99.68	98.08
Prevotella micans	0.04	20	1	99.37	99.05
Bulleidia extructa	0.04	18	1	99.68	98.4
Peptostreptococcus stomatis*	0.03	17	1	100	99.71
Veillonella atypica/parvula	0.03	17	1	99.38	98.12
Streptococcus mitis/oralis*	0.03	15	1	100	98.09
Rothia dentocariosa	0.03	14	1	99.68	99.36
Selenomonas noxia	0.03	14	1	98.78	98.78
Streptococcus gordonii	0.03	14	1	99.69	98.4
Prevotella intermedia*	0.03	13	1	100	99.37
Streptococcus constellatus*/intermedius	0.02	12	1	100	98.43
Streptococcus australis/oralis	0.02	11	1	98.41	98.1
Haemophilus haemolyticus	0.02	10	1	98.71	98.07
Prevotella oris	0.02	10	1	99.68	99.37
2.2.14 CF19
clinical workup
result_type	reported_result	lab notes
culture	4+ Contaminating oro-pharyngeal flora
sanger	No diagnosis (multiple templates)
BLAST against "clean" CF pathogens database
species	pct_reads	reads	clusters	max_percent	min_percent
no match	51.79	9475	34
Streptococcus pneumoniae/mitis	35.19	6437	6	99.68	99.02
Streptococcus infantis	5.7	1043	1	99.68	99.68
Streptococcus salivarius	3.81	697	1	99.37	99.04
Haemophilus parainfluenzae*	1.3	237	3	100	99.04
Streptococcus mitis	1.19	218	1	99.04	99.03
Streptococcus gordonii	1.02	187	1	99.38	99.38
BLAST against "clean" CF pathogens database including clusters < 20
species	pct_reads	reads	clusters	max_percent	min_percent
no match	52.13	9688	50
Streptococcus pneumoniae/mitis	34.64	6437	6	99.68	99.02
Streptococcus infantis	5.61	1043	1	99.68	99.68
Streptococcus salivarius	3.8	707	2	99.68	99.04
Streptococcus mitis	1.49	276	6	99.36	99.03
Haemophilus parainfluenzae*	1.33	247	4	100	99.04
Streptococcus gordonii	1.01	187	1	99.38	99.38
BLAST against all of RDP
species	pct_reads	reads	clusters	max_percent	min_percent
Streptococcus pseudopneumoniae/pneumoniae/mitis/oralis	32.07	6738	14	99.68	98.05
Streptococcus pneumoniae/mitis	12.34	2592	2	98.73	98.1
Streptococcus parasanguinis*	8.57	1801	5	100	98.1
no match	6.31	1326	16
Prevotella scopos/melaninogenica*	5.01	1052	2	100	98.42
Streptococcus infantis	4.96	1043	1	99.68	98.33
Granulicatella adiacens*/para-adiacens*	4.69	985	3	100	98.44
Veillonella atypica*/dispar/parvula	3.66	769	1	100	98.17
Streptococcus salivarius/vestibularis/thermophilus	3.37	707	2	99.68	98.73
Prevotella histicola*	3.16	664	3	100	98.74
Veillonella parvula/dispar/atypica/denticariosi	2.3	484	3	99.7	98.11
Streptococcus sanguinis	2.11	443	1	98.73	98.1
Rothia mucilaginosa*	1.72	361	1	100	98.71
Rothia dentocariosa	1.39	293	1	99.68	99.36
Haemophilus parainfluenzae*	1.18	247	4	100	98.08
Gemella sanguinis*	1.07	224	2	100	99.69
Leptotrichia wadei	0.98	205	2	99.67	98.62
Streptococcus gordonii	0.89	187	1	99.38	98.08
Campylobacter concisus	0.79	166	1	98.7	98.06
Prevotella pallens*	0.7	147	2	100	98.41
Prevotella salivae	0.59	124	1	99.37	99.37
Actinomyces graevenitzii	0.41	87	3	99.67	99.02
Solobacterium moorei	0.31	66	1	99.04	98.71
Prevotella nanceiensis	0.23	49	1	99.68	99.04
Oribacterium sinus	0.22	46	2	99.69	98.45
Megasphaera micronuciformis*	0.19	39	1	100	99.7
Veillonella dispar*/parvula*/denticariosi	0.18	38	1	100	98.14
Neisseria meningitidis/cinerea*	0.17	36	1	100	98.71
Catonella morbi	0.1	20	1	98.17	98.17
Campylobacter gracilis*	0.07	15	1	100	99.67
Veillonella atypica/parvula	0.07	14	1	99.38	98.11
Prevotella oulorum	0.07	14	1	99.68	98.74
Prevotella melaninogenica	0.07	14	1	98.43	98.12
Prevotella denticola	0.07	14	1	99.37	98.74
2.2.15 CF20
clinical workup
result_type	reported_result	lab notes
culture	1+ Staphylococcus aureus, coagulase positive
culture	1+ Rhizobium radiobacter	(formerly Agrobacterium tumefaciens)
culture	3+ Achromobacter xylosoxidans colony type No.1	(formerly Alcaligenes xylosoxidans)
culture	3+ Achromobacter xylosoxidanscolony type No.2	(formerly Alcaligenes xylosoxidans)
culture	4+ Contaminating oro-pharyngeal flora
sanger	No diagnosis (multiple templates)
BLAST against "clean" CF pathogens database
species	pct_reads	reads	clusters	max_percent	min_percent
Achromobacter xylosoxidans*	45.76	16447	10	100	99
Streptococcus mitis	19.6	7045	7	99.68	99.03
no match	16.26	5843	32
Streptococcus sanguinis	8.63	3100	2	99.68	99.05
Streptococcus pneumoniae/mitis	6.7	2407	3	99.68	99.04
Streptococcus infantis	1.97	707	1	99.05	99.05
Streptococcus salivarius*	0.78	282	2	100	99.04
Haemophilus parainfluenzae	0.21	74	1	99.04	99.04
Streptococcus parasanguinis	0.1	36	1	99.05	99.05
BLAST against "clean" CF pathogens database including clusters < 20
species	pct_reads	reads	clusters	max_percent	min_percent
Achromobacter xylosoxidans*	45.2	16556	19	100	99
Streptococcus mitis	19.47	7132	14	99.68	99.03
no match	17.01	6231	62
Streptococcus sanguinis	8.56	3136	5	99.68	99.05
Streptococcus pneumoniae/mitis*	6.62	2424	4	100	99.02
Streptococcus infantis	1.93	707	1	99.05	99.05
Streptococcus salivarius*	0.8	294	3	100	99.04
Haemophilus parainfluenzae	0.25	93	2	99.04	99.04
Streptococcus parasanguinis	0.1	36	1	99.05	99.05
Streptococcus oralis	0.04	16	1	99.37	99.37
BLAST against all of RDP
species	pct_reads	reads	clusters	max_percent	min_percent
Achromobacter spanius/xylosoxidans*/denitrificans*/insolitus*/ruhlandii	41.95	15546	10	100	98.02
Streptococcus pseudopneumoniae/pneumoniae/mitis*/oralis	25.81	9566	19	100	98.05
Streptococcus sanguinis	8.87	3286	6	99.68	98.1
no match	5.3	1965	16
Achromobacter spanius/xylosoxidans/denitrificans/insolitus	3.05	1130	15	99.35	98
Streptococcus parasanguinis	2.53	937	4	99.68	98.1
Streptococcus infantis	1.96	728	2	99.05	98.01
Granulicatella adiacens*/para-adiacens*	1.62	600	5	100	98.13
Gemella sanguinis*	1.37	509	1	100	100
Streptococcus mitis/oralis	0.92	341	1	99.04	98.06
Streptococcus salivarius*/vestibularis/thermophilus	0.79	294	3	100	99.05
Rothia dentocariosa/mucilaginosa	0.78	289	1	99.68	98.07
Veillonella parvula*/dispar/atypica/denticariosi	0.52	192	3	100	98.11
Achromobacter xylosoxidans/denitrificans/insolitus	0.43	160	5	98.38	98.01
Streptococcus mitis	0.42	155	1	99.68	99.68
Veillonella dispar*/parvula*/denticariosi	0.39	144	1	100	98.14
Streptococcus oralis	0.38	139	3	99.37	98.06
Capnocytophaga leadbetteri	0.36	133	2	99.33	98.33
Prevotella scopos/melaninogenica	0.33	123	1	99.68	98.42
Fusobacterium nucleatum*	0.33	122	1	100	98.28
Capnocytophaga sputigena*	0.3	111	1	100	99.67
Haemophilus parainfluenzae	0.25	93	2	99.04	98.07
Veillonella atypica*/dispar/parvula	0.23	87	1	100	98.17
Fusobacterium periodonticum/nucleatum*	0.21	79	1	100	98.3
Rothia dentocariosa	0.15	56	1	99.68	99.36
Gemella haemolysans*	0.09	33	1	100	100
Campylobacter showae*	0.08	31	1	100	99.35
Rothia mucilaginosa*	0.08	29	1	100	98.71
Streptococcus pseudopneumoniae/pneumoniae/mitis	0.07	27	2	98.73	98.07
Prevotella nanceiensis*	0.07	26	1	100	99.36
Prevotella histicola*	0.06	24	1	100	99.37
Campylobacter concisus*	0.06	21	1	100	98.3
Gemella morbillorum*	0.05	18	1	100	100
Leptotrichia buccalis	0.04	14	1	99.02	98.36
Prevotella oris	0.03	12	1	99.68	99.05
Prevotella salivae	0.03	11	1	99.37	99.37
Streptococcus pneumoniae/mitis/oralis	0.03	10	1	99.37	98.05
Oribacterium sinus	0.03	10	1	99.69	99.69
Granulicatella elegans*	0.03	10	1	100	99.06
2.2.16 CF22
clinical workup
result_type	reported_result	lab notes
culture	4+ Contaminating oro-pharyngeal flora
sanger	No diagnosis (multiple templates)
BLAST against "clean" CF pathogens database
species	pct_reads	reads	clusters	max_percent	min_percent
no match	76.07	4977	30
Streptococcus mitis	19.78	1294	3	99.68	99.02
Streptococcus parasanguinis	1.42	93	1	99.05	99.05
Streptococcus salivarius*	1.15	75	1	100	99.04
Haemophilus parainfluenzae*	0.57	37	1	100	99.04
Streptococcus pneumoniae/mitis*	0.55	36	1	100	99.04
Streptococcus australis	0.47	31	1	99.05	99.05
BLAST against "clean" CF pathogens database including clusters < 20
species	pct_reads	reads	clusters	max_percent	min_percent
no match	76.3	5125	42
Streptococcus mitis	19.26	1294	3	99.68	99.02
Streptococcus parasanguinis	1.38	93	1	99.05	99.05
Streptococcus salivarius*	1.12	75	1	100	99.04
Streptococcus pneumoniae/mitis*	0.76	51	2	100	99.04
Haemophilus parainfluenzae*	0.55	37	1	100	99.04
Streptococcus australis	0.46	31	1	99.05	99.05
Streptococcus gordonii	0.16	11	1	99.69	99.07
BLAST against all of RDP
species	pct_reads	reads	clusters	max_percent	min_percent
no match	26.35	1858	21
Streptococcus pseudopneumoniae/pneumoniae/mitis*/oralis*	19.53	1377	6	100	98.05
Streptococcus pneumoniae/mitis*	17.3	1220	1	100	98.1
Streptococcus oralis	6.14	433	2	99.68	98.06
Streptococcus mitis	4.28	302	4	99.68	98.05
Streptococcus australis	3.18	224	1	99.01	98.73
Granulicatella adiacens*/para-adiacens*	3.03	214	3	100	98.74
Gemella sanguinis*	2.55	180	1	100	100
Rothia dentocariosa/mucilaginosa	2.34	165	1	99.68	98.07
Streptococcus sanguinis	2.17	153	1	98.42	98.04
Prevotella nanceiensis	2	141	1	99.68	99.36
Fusobacterium periodonticum*/nucleatum	1.96	138	2	100	98.28
Streptococcus infantis	1.83	129	1	98.73	98.01
Streptococcus parasanguinis	1.32	93	1	99.05	98.42
Streptococcus pneumoniae	1.22	86	1	98.09	98.09
Streptococcus salivarius*/vestibularis/thermophilus	1.06	75	1	100	99.37
Gemella haemolysans*	1.05	74	1	100	100
Veillonella parvula/dispar/atypica/denticariosi/tobetsuensis	0.69	49	1	99.68	98.14
Haemophilus parainfluenzae*	0.52	37	1	100	98.08
Streptococcus infantis/australis	0.44	31	1	99.34	98.08
Abiotrophia defectiva	0.3	21	1	99.38	98.76
Gemella morbillorum*	0.21	15	1	100	100
Streptococcus mitis/oralis	0.18	13	1	99.36	98.09
Rothia dentocariosa	0.18	13	1	99.68	99.36
Streptococcus gordonii	0.16	11	1	99.69	98.46
2.2.17 CF23
clinical workup
result_type	reported_result	lab notes
culture	4+ Contaminating oro-pharyngeal flora
BLAST against "clean" CF pathogens database
species	pct_reads	reads	clusters	max_percent	min_percent
no match	94.93	31341	59
Streptococcus salivarius*	2.98	984	3	100	99.04
Streptococcus infantis	1.5	496	1	99.05	99.05
Streptococcus pneumoniae/mitis	0.33	109	1	99.68	99.04
Stenotrophomonas maltophilia	0.1	34	1	99.68	99.03
Haemophilus parainfluenzae	0.08	28	1	99.68	99.04
Streptococcus mitis	0.07	24	1	99.05	99.03
BLAST against "clean" CF pathogens database including clusters < 20
species	pct_reads	reads	clusters	max_percent	min_percent
no match	94.89	32156	121
Streptococcus salivarius*	2.9	984	3	100	99.04
Streptococcus infantis	1.46	496	1	99.05	99.05
Streptococcus pneumoniae/mitis	0.32	109	1	99.68	99.04
Streptococcus mitis	0.19	66	4	99.36	99.03
Haemophilus parainfluenzae*	0.13	44	2	100	99.04
Stenotrophomonas maltophilia	0.1	34	1	99.68	99.03
BLAST against all of RDP
species	pct_reads	reads	clusters	max_percent	min_percent
Corynebacterium propinquum/pseudodiphtheriticum*	65.29	23805	24	100	98
no match	11.57	4218	45
Veillonella parvula*/dispar/atypica/denticariosi	4.44	1620	9	100	98.11
Fusobacterium periodonticum*/nucleatum	3.46	1262	3	100	98.28
Dolosigranulum pigrum*	3.24	1181	6	100	98.1
Streptococcus salivarius*/vestibularis/thermophilus	2.7	984	3	100	99.05
Streptococcus infantis	1.7	619	2	99.05	98.01
Veillonella parvula/dispar/atypica/denticariosi/tobetsuensis	0.82	300	1	99.68	98.14
Prevotella pallens*	0.77	281	2	100	98.41
Veillonella atypica*/dispar/parvula	0.67	246	3	100	98.15
Corynebacterium pseudodiphtheriticum	0.56	203	11	99.34	98.02
Streptococcus parasanguinis	0.49	179	4	99.68	98.1
Streptococcus pseudopneumoniae/pneumoniae/mitis/oralis	0.4	147	3	99.68	98.06
Porphyromonas catoniae	0.35	128	1	98.11	98.11
Oribacterium sinus*	0.33	120	2	100	99.07
Veillonella atypica	0.32	118	1	98.46	98.46
Campylobacter concisus	0.32	117	2	98.7	98.05
Veillonella dispar*/parvula*/denticariosi	0.29	107	3	100	98.14
Streptococcus pneumoniae/mitis/oralis	0.27	98	1	99.68	98.06
Megasphaera micronuciformis*	0.25	92	1	100	99.7
Prevotella salivae	0.18	66	1	99.68	99.68
Streptococcus oralis/mitis/australis	0.17	61	1	98.08	98.03
Rothia dentocariosa/mucilaginosa	0.16	58	1	99.68	98.07
Gemella haemolysans	0.16	58	2	99.37	98.75
Fusobacterium nucleatum*	0.13	49	2	100	98.26
Haemophilus parainfluenzae*	0.12	44	2	100	98.08
Prevotella nanceiensis*	0.12	44	1	100	99.36
Pseudomonas geniculata/hibiscicola;Stenotrophomonas pavanii/maltophilia	0.09	34	1	99.68	98.07
Streptococcus mitis/cristatus	0.09	34	1	98.73	98.1
Peptostreptococcus stomatis	0.09	31	1	99.41	99.12
Streptococcus mitis/oralis	0.06	22	1	99.36	98.09
Campylobacter showae	0.05	19	1	99	98.38
Streptococcus infantis/oralis	0.05	17	1	98.73	98.41
Streptococcus pneumoniae/mitis	0.04	16	1	99.36	98.41
Simonsiella muelleri	0.04	15	1	99.68	99.04
Veillonella parvula	0.03	12	1	98.18	98.11
Streptococcus mitis	0.03	12	1	99.04	98.1
Streptococcus pneumoniae/mitis/infantis/oralis	0.03	12	1	99.36	98.05
Granulicatella elegans	0.03	11	1	99.68	99.06
Veillonella atypica/parvula	0.03	10	1	99.38	98.11
Selenomonas noxia	0.03	10	1	99.08	99.08
2.2.18 CF26
clinical workup
result_type	reported_result	lab notes
culture	4+ Staphylococcus aureus, coagulase positive colony type No.1
culture	4+ Staphylococcus aureus, coagulase positive colony type No.2
culture	1+ Stenotrophomonas maltophilia
culture	4+ Contaminating oro-pharyngeal flora
sanger	No diagnosis (multiple templates)
BLAST against "clean" CF pathogens database
species	pct_reads	reads	clusters	max_percent	min_percent
Staphylococcus aureus*	49.68	27121	9	100	99.05
Pseudomonas aeruginosa*	15.56	8493	4	100	99.35
no match	13.32	7271	60
Streptococcus pneumoniae/mitis	11.7	6387	7	99.68	99.02
Streptococcus mitis	5.57	3041	5	99.68	99.03
Streptococcus salivarius*	1.3	712	3	100	99.04
Streptococcus constellatus/intermedius	0.97	531	1	99.69	99.69
Streptococcus oralis	0.97	529	1	99.37	99.37
Streptococcus infantis	0.62	336	1	99.05	99.05
Streptococcus sanguinis	0.24	133	1	99.68	99.37
Streptococcus gordonii	0.08	42	1	99.69	99.69
BLAST against "clean" CF pathogens database including clusters < 20
species	pct_reads	reads	clusters	max_percent	min_percent
Staphylococcus aureus*	49.35	27406	33	100	99.05
Pseudomonas aeruginosa*	15.44	8572	11	100	99.34
no match	13.95	7745	95
Streptococcus pneumoniae/mitis	11.53	6404	8	99.68	99.02
Streptococcus mitis	5.58	3098	9	99.68	99.03
Streptococcus salivarius*	1.3	722	4	100	99.04
Streptococcus oralis	0.97	540	2	99.37	99.05
Streptococcus constellatus/intermedius	0.96	531	1	99.69	99.69
Streptococcus infantis	0.61	336	1	99.05	99.05
Streptococcus sanguinis	0.24	133	1	99.68	99.37
Streptococcus gordonii	0.08	42	1	99.69	99.69
BLAST against all of RDP
species	pct_reads	reads	clusters	max_percent	min_percent
Staphylococcus aureus*	37.6	27603	35	100	98.11
Atopobium vaginae*	21.88	16067	7	100	99.34
Streptococcus pseudopneumoniae/pneumoniae/mitis/oralis	12.99	9535	19	99.68	98.05
Pseudomonas aeruginosa*	11.81	8672	16	100	98.38
no match	3	2205	37
Streptococcus infantis	1.34	984	2	99.05	98.1
Streptococcus oralis	1.22	895	5	99.68	98.41
Prevotella scopos/melaninogenica*	1.04	766	4	100	98.12
Streptococcus parasanguinis	1.04	765	4	99.68	98.1
Streptococcus pneumoniae/mitis	1.02	750	3	98.73	98.07
Streptococcus salivarius*/vestibularis/thermophilus	0.98	722	4	100	98.41
Veillonella atypica*/dispar/parvula	0.96	706	1	100	98.17
Streptococcus constellatus/intermedius	0.72	531	1	99.69	98.74
Granulicatella adiacens/para-adiacens	0.53	387	5	99.69	98.12
Porphyromonas catoniae	0.49	360	4	99.37	98.11
Prevotella salivae	0.38	278	1	99.37	99.37
Streptococcus sanguinis	0.32	238	3	99.68	98.04
Prevotella histicola*	0.27	200	1	100	99.37
Prevotella pallens*	0.27	199	2	100	98.42
Gemella haemolysans	0.23	168	3	99.06	98.75
Gemella sanguinis	0.23	167	1	99.69	99.69
Veillonella parvula/dispar/atypica/denticariosi	0.19	138	2	99.7	98.18
[Leptotrichia] amnionii*	0.17	123	1	100	100
Atopobium parvulum	0.16	118	1	99.35	99.35
Granulicatella elegans	0.13	92	2	99.06	98.39
Veillonella dispar/parvula/denticariosi	0.12	86	1	99.7	98.14
Rothia dentocariosa/mucilaginosa	0.1	74	1	99.68	98.07
Abiotrophia defectiva	0.09	67	1	99.07	98.45
Oribacterium sinus*	0.09	65	2	100	99.38
Streptococcus mitis	0.09	63	2	98.73	98.41
Leptotrichia wadei	0.06	47	2	99.02	98.62
Megasphaera micronuciformis*	0.06	43	1	100	99.7
Streptococcus gordonii	0.06	42	1	99.69	98.4
Streptococcus anginosus	0.05	38	1	98.77	98.15
Solobacterium moorei	0.05	34	1	99.04	98.71
Prevotella oris	0.04	27	1	99.68	99.05
Fusobacterium nucleatum/naviforme	0.03	24	1	98.38	98.03
Campylobacter concisus	0.03	22	1	99.03	98.38
Veillonella atypica/parvula	0.03	21	1	99.38	98.11
Prevotella melaninogenica	0.03	20	1	98.11	98.11
Actinomyces graevenitzii	0.03	19	1	99.34	99.34
Fusobacterium periodonticum/nucleatum	0.02	17	1	99.66	98.31
Eikenella corrodens*	0.02	17	1	100	99.36
Peptostreptococcus stomatis	0.02	13	1	99.71	99.41
Rothia dentocariosa	0.01	10	1	99.68	99.36
2.2.19 CF27
clinical workup
result_type	reported_result	lab notes
culture	3+ Presumptive mucoid Pseudomonas aeruginosa colony type No.1
culture	3+ Pseudomonas aeruginosa colony type No.2 :
culture	2+ Pseudomonas aeruginosa colony type No.3
culture	4+ Contaminating oro-pharyngeal flora
sanger	No diagnosis (multiple templates)
BLAST against "clean" CF pathogens database
species	pct_reads	reads	clusters	max_percent	min_percent
no match	58.33	31269	97
Streptococcus pneumoniae/mitis	19.94	10687	8	99.68	99.02
Streptococcus parasanguinis	6.58	3526	3	99.37	99.05
Pseudomonas aeruginosa*	6.11	3275	1	100	100
Streptococcus intermedius	3.54	1896	3	99.69	99.07
Streptococcus salivarius*	2.76	1481	5	100	99.04
Streptococcus mitis	1.68	900	5	99.36	99.03
Streptococcus gordonii	0.6	319	1	99.07	99.07
Streptococcus mutans	0.27	146	1	99.69	99.07
Haemophilus parainfluenzae	0.2	109	1	99.36	99.04
BLAST against "clean" CF pathogens database including clusters < 20
species	pct_reads	reads	clusters	max_percent	min_percent
no match	58.81	32149	167
Streptococcus pneumoniae/mitis	19.61	10720	11	99.68	99.02
Streptococcus parasanguinis	6.45	3526	3	99.37	99.05
Pseudomonas aeruginosa*	6.08	3322	4	100	99.01
Streptococcus intermedius	3.47	1896	3	99.69	99.07
Streptococcus salivarius*	2.73	1493	6	100	99.04
Streptococcus mitis	1.78	974	11	99.36	99.03
Streptococcus gordonii	0.61	334	2	99.69	99.07
Streptococcus mutans	0.27	146	1	99.69	99.07
Haemophilus parainfluenzae	0.2	109	1	99.36	99.04
BLAST against all of RDP
species	pct_reads	reads	clusters	max_percent	min_percent
Streptococcus pseudopneumoniae/pneumoniae/mitis/oralis	21.48	12094	30	99.68	98.05
Streptococcus parasanguinis*	12.46	7016	17	100	98.1
Granulicatella adiacens*/para-adiacens*	11.02	6203	27	100	98.11
Veillonella atypica*/dispar/parvula	9.49	5344	4	100	98.15
Gemella haemolysans	7.84	4413	19	99.69	98.03
Pseudomonas aeruginosa*	5.9	3322	4	100	99.01
Streptococcus pneumoniae/mitis*	4.4	2478	2	100	98.1
no match	4.27	2404	56
Streptococcus constellatus/intermedius	3.37	1896	3	99.69	98.15
Veillonella dispar*/parvula*/denticariosi	2.93	1649	3	100	98.14
Streptococcus salivarius	2.89	1629	3	98.38	98.07
Veillonella parvula/dispar/atypica/denticariosi	2.84	1599	4	99.7	98.11
Streptococcus salivarius*/vestibularis*/thermophilus	2.65	1493	6	100	98.1
Prevotella nanceiensis*	1.18	665	1	100	99.36
Rothia dentocariosa/mucilaginosa	0.86	482	1	99.68	98.07
Streptococcus salivarius/vestibularis	0.76	428	1	98.42	98.1
Oribacterium sinus	0.67	377	3	99.69	99.07
Streptococcus gordonii	0.59	334	2	99.69	98.15
Gemella sanguinis*	0.44	250	2	100	99.69
Veillonella atypica	0.44	247	2	98.77	98.76
Rothia dentocariosa	0.4	226	1	99.68	99.36
Streptococcus oralis	0.39	222	3	99.36	98.06
Leptotrichia wadei	0.36	201	2	99.34	98.28
Prevotella melaninogenica	0.31	172	2	98.42	98.11
Prevotella salivae	0.29	164	2	99.37	99.05
Campylobacter concisus	0.29	161	1	98.38	98.05
Streptococcus mutans	0.26	146	1	99.69	98.46
Corynebacterium propinquum/pseudodiphtheriticum*	0.24	136	1	100	98.03
Haemophilus parainfluenzae	0.19	109	1	99.36	98.39
Prevotella oulorum	0.14	78	1	99.68	98.74
Prevotella denticola	0.09	51	1	99.68	99.05
Veillonella parvula/dispar/atypica/denticariosi/tobetsuensis	0.08	46	1	99.69	98.14
Campylobacter gracilis*	0.08	45	1	100	99.35
Solobacterium moorei*	0.07	38	1	100	98.39
Prevotella oris	0.06	32	1	99.37	98.73
Streptococcus mitis	0.05	27	2	98.1	98.05
Megasphaera micronuciformis*	0.04	20	1	100	99.7
Streptococcus anginosus	0.03	19	1	98.77	98.15
Lactococcus lactis	0.03	18	1	99.68	98.73
Capnocytophaga sputigena	0.03	18	1	99.02	98.69
Propionibacterium acidifaciens	0.03	16	1	99.35	99.35
Eikenella corrodens*	0.02	12	1	100	99.68
Haemophilus haemolyticus	0.02	12	1	98.39	98.07
Streptococcus pneumoniae	0.02	11	1	98.1	98.1
Eubacterium saburreum	0.02	10	1	98.46	98.46
2.2.20 CF28
clinical workup
result_type	reported_result	lab notes
culture	3+ Pseudomonas aeruginosa
culture	2+ mucoid Presumptive Pseudomonas aeruginosa
culture	2+ Staphylococcus aureus, coagulase positive
culture	2+ Staphylococcus aureus, coagulase positive
sanger	No diagnosis (multiple templates)
BLAST against "clean" CF pathogens database
species	pct_reads	reads	clusters	max_percent	min_percent
Pseudomonas aeruginosa*	67.04	31857	16	100	99.02
Achromobacter xylosoxidans*	14.95	7104	4	100	99
no match	12.06	5730	30
Streptococcus pneumoniae/mitis*	2.86	1358	1	100	99.04
Streptococcus mitis	2.1	1000	8	99.68	99.03
Streptococcus parasanguinis	0.46	220	1	99.05	99.05
Streptococcus salivarius*	0.16	75	1	100	99.04
Streptococcus gordonii	0.14	66	1	99.07	99.07
Streptococcus sanguinis	0.09	42	1	99.68	99.37
Streptococcus oralis	0.07	34	1	99.37	99.37
Streptococcus agalactiae	0.07	33	1	99.68	99.04
BLAST against "clean" CF pathogens database including clusters < 20
species	pct_reads	reads	clusters	max_percent	min_percent
Pseudomonas aeruginosa*	66.74	32057	33	100	99.02
Achromobacter xylosoxidans*	14.91	7162	8	100	99
no match	12.41	5961	48
Streptococcus pneumoniae/mitis*	2.83	1358	1	100	99.04
Streptococcus mitis	2.08	1000	8	99.68	99.03
Streptococcus parasanguinis	0.48	232	2	99.05	99.05
Streptococcus salivarius*	0.16	75	1	100	99.04
Streptococcus gordonii	0.14	66	1	99.07	99.07
Streptococcus sanguinis	0.09	42	1	99.68	99.37
Streptococcus oralis	0.07	34	1	99.37	99.37
Streptococcus agalactiae	0.07	33	1	99.68	99.04
Staphylococcus aureus*	0.02	10	1	100	99.68
BLAST against all of RDP
species	pct_reads	reads	clusters	max_percent	min_percent
Pseudomonas aeruginosa*	67.02	32201	37	100	98.07
Achromobacter spanius/xylosoxidans*/denitrificans*/insolitus*/ruhlandii	14.81	7114	5	100	98.02
Streptococcus pseudopneumoniae/pneumoniae/mitis*/oralis*	5.21	2501	10	100	98.05
Streptococcus parasanguinis*	4.29	2061	9	100	98.1
Streptococcus oralis	2.41	1156	5	99.37	98.1
Granulicatella adiacens*/para-adiacens	1.34	645	4	100	99.06
no match	1.18	567	15
Streptococcus mitis	1.03	493	1	98.41	98.05
Veillonella dispar*/parvula*/denticariosi	0.55	264	1	100	98.14
Streptococcus salivarius/vestibularis	0.46	222	1	98.42	98.1
Gemella haemolysans*	0.31	149	3	100	98.12
Achromobacter xylosoxidans/denitrificans/insolitus	0.3	142	1	98.07	98
Rothia dentocariosa	0.24	116	1	99.68	99.36
Achromobacter spanius/xylosoxidans/denitrificans/insolitus	0.16	76	5	99.35	98
Streptococcus salivarius*/vestibularis/thermophilus	0.16	75	1	100	99.37
Streptococcus gordonii	0.14	66	1	99.69	98.15
Rothia mucilaginosa	0.13	64	1	99.36	98.71
Streptococcus sanguinis	0.09	42	1	99.68	98.1
Streptococcus agalactiae	0.07	33	1	99.68	98.04
Granulicatella adiacens	0.04	20	1	98.76	98.45
Prevotella scopos/melaninogenica*	0.04	18	1	100	98.42
Veillonella atypica/dispar/parvula	0.03	13	1	99.69	98.15
Staphylococcus aureus*	0.02	10	1	100	99.68
2.2.21 CF29
clinical workup
result_type	reported_result	lab notes
culture	3+ Presumptive mucoid Pseudomonas aeruginosa
culture	2+ Staphylococcus aureus, coagulase positive
culture	4+ Contaminating oro-pharyngeal flora
sanger	No diagnosis (multiple templates)
BLAST against "clean" CF pathogens database
species	pct_reads	reads	clusters	max_percent	min_percent
no match	47.3	25548	70
Streptococcus salivarius*	15.92	8598	7	100	99.04
Pseudomonas aeruginosa*	15.2	8208	4	100	99.02
Stenotrophomonas maltophilia	9.81	5298	2	99.68	99.02
Streptococcus parasanguinis	7.13	3853	1	99.37	99.05
Streptococcus pneumoniae/mitis	3.97	2147	4	99.68	99.02
Streptococcus mitis	0.48	257	3	99.36	99.03
Streptococcus infantis	0.16	87	2	99.05	99.05
Streptococcus oralis	0.04	20	1	99.04	99.04
BLAST against "clean" CF pathogens database including clusters < 20
species	pct_reads	reads	clusters	max_percent	min_percent
no match	47.73	26303	128
Streptococcus salivarius*	15.67	8636	10	100	99.04
Pseudomonas aeruginosa*	14.99	8260	8	100	99.02
Stenotrophomonas maltophilia	9.79	5397	9	99.68	99
Streptococcus parasanguinis	7.02	3870	2	99.37	99.05
Streptococcus pneumoniae/mitis	3.98	2191	8	99.68	99.02
Streptococcus mitis	0.53	294	6	99.36	99.03
Streptococcus infantis	0.16	87	2	99.05	99.05
Streptococcus oralis	0.04	20	1	99.04	99.04
Staphylococcus aureus	0.03	14	1	99.68	99.37
Streptococcus gordonii	0.02	12	1	99.69	99.69
Streptococcus australis	0.02	12	1	99.37	99.37
Achromobacter xylosoxidans*	0.02	11	1	100	99.01
BLAST against all of RDP
species	pct_reads	reads	clusters	max_percent	min_percent
no match	19.05	13979	76
Streptococcus parasanguinis	13.45	9874	10	99.37	98.05
Streptococcus salivarius*/vestibularis/thermophilus	11.77	8636	10	100	98.08
Prevotella histicola*	11.35	8328	9	100	98.11
Pseudomonas aeruginosa*	11.28	8276	9	100	98.06
Pseudomonas geniculata/hibiscicola;Stenotrophomonas pavanii/maltophilia	7.07	5189	2	99.68	98.05
Veillonella atypica*/dispar/parvula	5.88	4313	4	100	98.15
Streptococcus pseudopneumoniae/pneumoniae/mitis/oralis	3.48	2555	15	99.68	98.05
Streptococcus infantis	2.05	1507	5	99.05	98.1
Gemella haemolysans	1.65	1210	4	99.69	98.04
Veillonella parvula/dispar/atypica/denticariosi	1.59	1166	1	99.69	98.11
Megasphaera micronuciformis*	1.44	1056	4	100	98.51
Streptococcus mitis	1.42	1045	4	99.68	98.1
Prevotella tannerae	1.31	962	4	99.68	98.11
Prevotella salivae	0.97	713	6	99.68	98.73
Oribacterium sinus	0.9	659	2	99.07	98.76
Granulicatella adiacens*/para-adiacens*	0.86	630	6	100	98.44
Solobacterium moorei*	0.79	577	3	100	98.07
Rothia dentocariosa/mucilaginosa	0.59	431	1	99.68	98.07
Fusobacterium nucleatum	0.42	306	1	98.64	98.64
Atopobium parvulum	0.34	248	1	99.02	99.02
Pseudomonas hibiscicola;Stenotrophomonas pavanii/maltophilia	0.28	208	7	99.68	98.04
Prevotella pallens	0.25	186	1	99.37	98.41
Prevotella melaninogenica	0.24	179	1	98.11	98.11
Eikenella corrodens	0.24	173	1	99.67	99.36
Fusobacterium periodonticum*/nucleatum*	0.22	165	2	100	98.28
Gemella morbillorum	0.19	141	1	99.37	99.37
Prevotella scopos/melaninogenica*	0.1	77	1	100	98.74
Shuttleworthia satelles*	0.08	56	1	100	99.69
Stenotrophomonas pavanii/maltophilia	0.07	54	2	98.72	98.06
Streptococcus sanguinis	0.06	45	2	99.37	98.1
Prevotella oris	0.05	40	2	99.37	98.73
Streptococcus pneumoniae/mitis*	0.05	38	2	100	98.1
Veillonella dispar*/parvula*/denticariosi	0.05	34	2	100	98.14
Prevotella denticola	0.04	32	1	99.06	98.43
Veillonella atypica	0.04	31	2	99.07	98.45
Stenotrophomonas maltophilia	0.04	30	2	98.09	98.01
Porphyromonas catoniae	0.04	28	1	98.73	98.73
Prevotella nanceiensis*	0.03	25	2	100	99.04
Streptococcus oralis	0.03	20	1	99.68	98.41
Peptostreptococcus stomatis*	0.03	19	1	100	99.71
Tannerella forsythia*	0.02	18	1	100	98.39
Lactobacillus vaginalis	0.02	18	1	99.71	98.5
Staphylococcus aureus	0.02	14	1	99.68	99.37
Gemella sanguinis	0.02	14	1	99.69	99.69
Veillonella parvula/dispar/atypica/denticariosi/tobetsuensis	0.02	14	1	99.39	98.14
Streptococcus australis	0.02	12	1	99.67	99.37
Streptococcus gordonii	0.02	12	1	99.69	98.4
Achromobacter spanius/xylosoxidans*/denitrificans*/insolitus*/ruhlandii	0.01	11	1	100	98.03
Veillonella atypica/parvula	0.01	11	1	99.38	98.12
Leptotrichia trevisanii	0.01	11	1	99.34	98.96
Streptococcus pneumoniae/mitis/oralis	0.01	10	1	99.37	98.05
Dialister micraerophilus	0.01	10	1	99.7	99.7
2.2.22 CF30
clinical workup
result_type	reported_result	lab notes
culture	3+ Presumptive mucoid Pseudomonas aeruginosa
culture	3+ Presumptive mucoid Pseudomonas aeruginosa
culture	3+ Stenotrophomonas maltophilia
culture	4+ Contaminating oro-pharyngeal flora
sanger	No diagnosis (multiple templates)
BLAST against "clean" CF pathogens database
species	pct_reads	reads	clusters	max_percent	min_percent
Pseudomonas aeruginosa*	61.53	18952	7	100	99.02
no match	22.6	6962	20
Streptococcus mitis	7.8	2403	3	99.68	99.03
Streptococcus sanguinis	7.29	2245	1	99.68	99.37
Streptococcus pneumoniae/mitis	0.47	145	1	99.68	99.02
Stenotrophomonas maltophilia	0.3	93	1	99.68	99.03
BLAST against "clean" CF pathogens database including clusters < 20
species	pct_reads	reads	clusters	max_percent	min_percent
Pseudomonas aeruginosa*	61.15	19015	12	100	99.02
no match	23.06	7172	36
Streptococcus mitis	7.73	2403	3	99.68	99.03
Streptococcus sanguinis	7.22	2245	1	99.68	99.37
Streptococcus pneumoniae/mitis	0.47	145	1	99.68	99.02
Stenotrophomonas maltophilia	0.3	93	1	99.68	99.03
Streptococcus oralis	0.04	12	1	99.36	99.36
Streptococcus salivarius	0.04	12	1	99.37	99.05
BLAST against all of RDP
species	pct_reads	reads	clusters	max_percent	min_percent
Pseudomonas aeruginosa*	38.52	19074	16	100	98.38
Prevotella histicola*	18.99	9405	16	100	98.12
Streptococcus parasanguinis	7.94	3932	6	99.37	98.05
Prevotella melaninogenica	4.91	2430	5	98.74	98.11
Streptococcus pseudopneumoniae/pneumoniae/mitis/oralis	4.86	2406	3	99.68	98.05
Streptococcus sanguinis	4.53	2245	1	99.68	98.1
Prevotella denticola	3.93	1944	6	99.68	98.11
Prevotella salivae	3.53	1747	7	99.37	98.72
Prevotella oris*	2.93	1449	5	100	98.11
no match	1.79	887	17
Solobacterium moorei*	1.46	721	3	100	98.08
Veillonella parvula/dispar/atypica/denticariosi	1.19	589	2	99.7	98.11
Veillonella atypica*/dispar/parvula	1.15	571	1	100	98.17
Prevotella scopos/melaninogenica*	0.67	332	4	100	98.11
Prevotella oralis	0.57	284	1	99.67	98.44
Atopobium parvulum	0.53	264	1	99.67	99.67
Shuttleworthia satelles*	0.41	201	2	100	99.69
Prevotella veroralis	0.4	199	1	99.37	99.05
Prevotella nigrescens*	0.3	151	1	100	99.05
Streptococcus mitis/oralis	0.29	142	1	99.05	98.06
Rothia mucilaginosa	0.19	96	1	99.36	98.71
Pseudomonas geniculata/hibiscicola;Stenotrophomonas pavanii/maltophilia	0.19	93	1	99.68	98.07
Veillonella dispar*/parvula*/denticariosi	0.16	80	2	100	98.14
Veillonella parvula/dispar/atypica/denticariosi/tobetsuensis	0.1	51	2	99.69	98.14
Propionibacterium propionicum	0.1	48	1	99.34	98.7
Campylobacter concisus	0.08	42	1	99.03	98.38
Prevotella oulorum	0.08	39	1	99.68	98.74
Rothia dentocariosa*	0.05	23	1	100	99.68
Dialister invisus*	0.04	19	1	100	98.2
Atopobium rimae	0.03	15	1	99.68	99.35
Streptococcus oralis	0.02	12	1	99.36	98.73
Streptococcus salivarius/vestibularis/thermophilus	0.02	12	1	99.37	98.73
Fusobacterium nucleatum	0.02	10	1	98.64	98.64
Curvibacter delicatus/lanceolatus/gracilis;Aquamonas fontana	0.02	10	1	99.67	98.37
2.2.23 CF31
clinical workup
result_type	reported_result	lab notes
culture	1+ Klebsiella oxytoca
culture	2+ mucoid Presumptive Pseudomonas aeruginosa colony type
culture	1+ Pseudomonas putida group	: identification by sequence analysis .
culture	3+ Staphylococcus aureus, coagulase positive colony type No.1
culture	3+ Staphylococcus aureus, coagulase positive colony type No.2
culture	2+ Staphylococcus aureus, coagulase positive colony type No.3
culture	4+ Contaminating oro-pharyngeal flora
sanger	No diagnosis (multiple templates)
BLAST against "clean" CF pathogens database
species	pct_reads	reads	clusters	max_percent	min_percent
no match	76.42	13017	55
Streptococcus salivarius*	9.65	1643	5	100	99.04
Streptococcus infantis	2.87	488	1	99.68	99.68
Streptococcus intermedius	2.55	435	1	99.69	99.68
Streptococcus pneumoniae/mitis	2.42	413	1	99.68	99.02
Streptococcus parasanguinis	1.77	301	1	99.37	99.05
Streptococcus mitis	1.41	241	3	99.05	99.03
Streptococcus sanguinis	1.07	183	1	99.68	99.37
Pseudomonas aeruginosa*	0.65	110	1	100	100
Streptococcus gordonii	0.49	83	1	99.69	99.69
Streptococcus oralis	0.41	69	1	99.68	99.68
Haemophilus parainfluenzae	0.29	50	1	99.36	99.04
BLAST against "clean" CF pathogens database including clusters < 20
species	pct_reads	reads	clusters	max_percent	min_percent
no match	76.84	13472	89
Streptococcus salivarius*	9.53	1671	7	100	99.04
Streptococcus infantis	2.78	488	1	99.68	99.68
Streptococcus intermedius	2.48	435	1	99.69	99.68
Streptococcus pneumoniae/mitis	2.36	413	1	99.68	99.02
Streptococcus parasanguinis	1.72	301	1	99.37	99.05
Streptococcus mitis	1.37	241	3	99.05	99.03
Streptococcus sanguinis	1.04	183	1	99.68	99.37
Pseudomonas aeruginosa*	0.63	110	1	100	100
Streptococcus gordonii	0.47	83	1	99.69	99.69
Streptococcus oralis	0.39	69	1	99.68	99.68
Haemophilus parainfluenzae	0.29	50	1	99.36	99.04
Streptococcus anginosus	0.09	16	1	99.38	99.38
BLAST against all of RDP
species	pct_reads	reads	clusters	max_percent	min_percent
no match	13.58	3124	29
Prevotella histicola*	13.07	3006	3	100	98.74
Streptococcus infantis	8.06	1854	2	99.68	98.1
Streptococcus salivarius*/vestibularis/thermophilus	7.27	1671	7	100	98.11
Granulicatella adiacens*/para-adiacens*	7.25	1667	11	100	98.12
Prevotella scopos/melaninogenica*	6.5	1494	4	100	98.11
Streptococcus parasanguinis	5.67	1304	3	99.68	98.1
Veillonella parvula*/dispar/atypica/denticariosi	4.31	991	5	100	98.11
Veillonella atypica*/dispar/parvula	3.96	911	1	100	98.17
Veillonella parvula/dispar/atypica/denticariosi/tobetsuensis	3.15	725	2	99.69	98.14
Oribacterium sinus	2.65	610	6	99.69	98.14
Streptococcus pseudopneumoniae/pneumoniae/mitis/oralis	2.62	603	4	99.68	98.05
Prevotella salivae*	2.31	531	6	100	99.05
Megasphaera micronuciformis*	2.02	465	2	100	99.1
Gemella sanguinis*	2.02	464	2	100	99.69
Streptococcus constellatus/intermedius	1.89	435	1	99.69	98.15
Rothia dentocariosa/mucilaginosa	1.7	392	1	99.68	98.07
Candidatus Prevotella conceptionensis	1.45	334	1	98.41	98.1
Prevotella oris*	1.06	243	2	100	98.42
Atopobium parvulum	0.98	225	1	99.67	99.67
Streptococcus mitis	0.92	211	2	99.68	99.37
Streptococcus sanguinis	0.8	183	1	99.68	98.1
Streptococcus pneumoniae/mitis*	0.69	159	1	100	98.1
Campylobacter concisus	0.6	137	3	99.03	98.05
Solobacterium moorei*	0.58	134	1	100	98.39
Veillonella dispar*/parvula*/denticariosi	0.55	127	3	100	98.14
Gemella haemolysans	0.5	114	2	99.38	98.75
Pseudomonas aeruginosa*	0.48	110	1	100	100
Abiotrophia defectiva	0.4	92	2	98.76	98.14
Streptococcus gordonii	0.36	83	1	99.69	98.4
Streptococcus oralis	0.36	82	2	99.68	98.1
Gemella morbillorum	0.32	74	1	99.37	99.37
Campylobacter gracilis*	0.28	65	2	100	98.38
Streptococcus mitis/oralis	0.27	63	1	99.05	98.06
Haemophilus parainfluenzae	0.22	50	1	99.36	98.39
Granulicatella elegans*	0.21	48	1	100	99.06
Prevotella loescheii;Candidatus Prevotella conceptionensis	0.13	30	1	99.05	98.41
Veillonella atypica/parvula	0.11	25	1	99.38	98.11
Catonella morbi	0.11	25	1	98.78	98.47
Rothia mucilaginosa*	0.1	24	2	100	98.07
Rothia dentocariosa	0.09	21	1	99.68	99.36
Streptococcus salivarius	0.08	19	1	98.73	98.07
Veillonella atypica	0.07	17	1	99.07	99.07
Dialister micraerophilus	0.07	17	1	99.7	99.7
Streptococcus anginosus	0.07	16	1	99.38	98.77
Selenomonas noxia	0.06	13	1	98.47	98.47
Fusobacterium nucleatum/naviforme	0.05	12	1	99.03	98.03
2.2.24 CF32
clinical workup
result_type	reported_result	lab notes
culture	3+ Pseudomonas aeruginosa colony type No.1
culture	3+ Pseudomonas aeruginosa colony type No.2
culture	3+ Serratia marcescens
culture	4+ Contaminating oro-pharyngeal flora
sanger	Streptococcus mitis group
BLAST against "clean" CF pathogens database
species	pct_reads	reads	clusters	max_percent	min_percent
Streptococcus pneumoniae/mitis	87.66	23875	3	99.36	99.03
no match	4.26	1161	17
Pseudomonas aeruginosa*	4.26	1160	1	100	100
Streptococcus mitis	3.13	852	12	99.36	99.02
Streptococcus infantis	0.24	65	1	99.05	99.05
Haemophilus parainfluenzae*	0.13	35	1	100	99.04
Streptococcus australis	0.11	30	1	99.37	99.37
Haemophilus parahaemolyticus	0.11	29	1	99.36	99.36
Staphylococcus aureus	0.1	28	1	99.68	99.37
BLAST against "clean" CF pathogens database including clusters < 20
species	pct_reads	reads	clusters	max_percent	min_percent
Streptococcus pneumoniae/mitis	86.19	23911	6	99.36	99.03
no match	5.26	1459	38
Pseudomonas aeruginosa*	4.18	1160	1	100	100
Streptococcus mitis	3.69	1025	25	99.36	99.02
Streptococcus infantis	0.23	65	1	99.05	99.05
Haemophilus parainfluenzae*	0.13	35	1	100	99.04
Streptococcus australis	0.11	30	1	99.37	99.37
Haemophilus parahaemolyticus	0.1	29	1	99.36	99.36
Staphylococcus aureus	0.1	28	1	99.68	99.37
BLAST against all of RDP
species	pct_reads	reads	clusters	max_percent	min_percent
Streptococcus pseudopneumoniae/pneumoniae/mitis/oralis	89.74	24939	36	99.36	98.05
Pseudomonas aeruginosa*	4.17	1160	1	100	100
no match	1.36	379	9
Gemella haemolysans*	1	278	3	100	98.75
Streptococcus oralis	0.44	123	1	99.68	99.68
Corynebacterium jeikeium/falsenii	0.44	122	1	98.38	98.36
Streptococcus mitis/oralis	0.41	113	2	99.05	98.05
Streptococcus pneumoniae/mitis/infantis/oralis	0.32	90	1	99.36	98.05
Streptococcus pneumoniae/mitis*	0.29	80	5	100	98.06
Streptococcus infantis	0.23	65	1	99.05	98.34
Granulicatella elegans*	0.18	51	1	100	99.06
Leptotrichia wadei	0.15	41	1	99.34	98.28
Rothia dentocariosa/mucilaginosa	0.14	39	1	99.68	98.07
Haemophilus parainfluenzae*	0.13	35	1	100	98.08
Neisseria meningitidis/cinerea*	0.12	33	1	100	98.71
Streptococcus australis	0.11	30	1	99.67	99.37
Haemophilus parahaemolyticus	0.1	29	1	99.36	98.07
Staphylococcus aureus	0.1	28	1	99.68	99.37
Fusobacterium periodonticum*/nucleatum	0.08	23	1	100	98.31
Porphyromonas catoniae	0.08	23	2	99.05	98.1
Streptococcus pseudopneumoniae/pneumoniae/mitis	0.08	23	1	98.42	98.06
Streptococcus pneumoniae	0.06	18	1	98.09	98.09
Eikenella corrodens	0.06	18	1	99.68	99.36
Veillonella parvula/dispar/atypica/denticariosi	0.05	15	1	99.39	98.14
Leptotrichia hofstadii	0.05	13	1	99.67	99.34
Prevotella scopos/melaninogenica*	0.04	12	1	100	98.74
Streptococcus cristatus	0.04	10	1	98.41	98.09
2.2.25 CF33
clinical workup
result_type	reported_result	lab notes
culture	4+ Staphylococcus aureus
culture	1+ Stenotrophomonas maltophilia
culture	4+ Contaminating oro-pharyngeal flora
sanger	No diagnosis (multiple templates)
BLAST against "clean" CF pathogens database
species	pct_reads	reads	clusters	max_percent	min_percent
no match	44.08	30216	60
Staphylococcus aureus*	37.39	25631	10	100	99.05
Streptococcus pneumoniae/mitis	11.08	7595	7	99.68	99.02
Streptococcus salivarius*	4.84	3315	2	100	99.04
Streptococcus mitis	1.51	1038	10	99.36	99.03
Haemophilus influenzae	0.78	534	2	99.68	99.04
Haemophilus parainfluenzae*	0.14	98	2	100	99.04
Streptococcus sanguinis	0.1	68	1	99.37	99.05
Haemophilus parahaemolyticus	0.08	52	1	99.36	99.36
BLAST against "clean" CF pathogens database including clusters < 20
species	pct_reads	reads	clusters	max_percent	min_percent
no match	44.2	30732	98
Staphylococcus aureus*	37.37	25983	39	100	99.05
Streptococcus pneumoniae/mitis	10.94	7607	8	99.68	99.02
Streptococcus salivarius*	4.78	3325	3	100	99.04
Streptococcus mitis	1.57	1094	15	99.36	99.03
Haemophilus influenzae	0.77	534	2	99.68	99.04
Haemophilus parainfluenzae*	0.14	98	2	100	99.04
Streptococcus sanguinis	0.1	68	1	99.37	99.05
Haemophilus parahaemolyticus	0.07	52	1	99.36	99.36
Streptococcus gordonii	0.04	29	2	99.69	99.38
BLAST against all of RDP
species	pct_reads	reads	clusters	max_percent	min_percent
Staphylococcus aureus*	36.79	26006	41	100	98.1
Streptococcus infantis	14.89	10527	10	98.73	98.01
Streptococcus pseudopneumoniae/pneumoniae/mitis/oralis	12.34	8725	25	99.68	98.05
Granulicatella adiacens*/para-adiacens*	6.57	4644	7	100	98.13
Streptococcus parasanguinis	5.83	4120	4	99.37	98.05
Rothia dentocariosa/mucilaginosa	5.03	3554	1	99.68	98.07
Streptococcus salivarius*/vestibularis/thermophilus	4.7	3325	3	100	98.73
Gemella sanguinis*	2.68	1898	5	100	99.38
no match	2.6	1841	28
Veillonella parvula*/dispar/atypica/denticariosi	1.97	1391	9	100	98.11
Haemophilus influenzae	1.07	759	5	99.68	98.08
Fusobacterium periodonticum*/nucleatum	0.91	641	2	100	98.28
Streptococcus mitis/oralis	0.87	614	1	98.73	98.05
Streptococcus mitis	0.45	320	4	99.68	98.06
Streptococcus pneumoniae/mitis*	0.38	267	1	100	98.1
Veillonella atypica*/dispar/parvula	0.34	240	1	100	98.17
Campylobacter concisus	0.31	219	1	99.35	98.7
Gemella haemolysans*	0.29	205	3	100	98.75
Granulicatella elegans	0.28	195	2	99.68	99.06
Oribacterium sinus*	0.22	153	1	100	100
Prevotella scopos/melaninogenica	0.21	145	1	99.68	99.05
Streptococcus sanguinis/mitis	0.15	109	1	98.42	98.04
Rothia mucilaginosa	0.15	107	3	99.36	98.4
Prevotella pallens*	0.14	102	1	100	98.73
Haemophilus parainfluenzae*	0.14	98	2	100	98.08
Streptococcus sanguinis	0.1	68	1	99.37	99.02
Prevotella denticola	0.08	60	1	99.06	98.43
Haemophilus parahaemolyticus	0.07	52	1	99.36	98.07
Veillonella dispar/parvula*/denticariosi	0.07	47	1	100	98.14
Streptococcus cristatus	0.05	38	1	98.1	98.1
Atopobium parvulum	0.05	35	1	99.35	99.35
Solobacterium moorei	0.05	32	1	99.68	98.07
Streptococcus gordonii	0.04	29	2	99.69	98.15
Campylobacter showae	0.03	24	1	98.7	98.66
Streptococcus pseudopneumoniae/mitis	0.03	24	1	98.1	98.1
Streptococcus oralis	0.03	19	1	98.09	98.06
Rothia dentocariosa	0.02	17	1	99.68	99.36
Catonella morbi	0.02	11	1	99.08	98.78
Rhodococcus cercidiphylli/fascians	0.01	10	1	99.31	98.01
Megasphaera micronuciformis	0.01	10	1	99.7	99.4
Prevotella salivae	0.01	10	1	99.05	99.05
2.2.26 CF34
clinical workup
result_type	reported_result	lab notes
culture	3+ Staphylococcus aureus, coagulase positive colony type No.1
culture	3+ Staphylococcus aureus, coagulase positive colony type No.2
culture	4+ Contaminating oro-pharyngeal flora
sanger	No diagnosis (multiple templates)
BLAST against "clean" CF pathogens database
species	pct_reads	reads	clusters	max_percent	min_percent
no match	76.67	64547	76
Streptococcus salivarius*	10.92	9191	3	100	99.04
Streptococcus infantis	6.68	5627	2	99.05	99.05
Staphylococcus aureus	3.38	2849	4	99.68	99.05
Streptococcus pneumoniae/mitis	1.14	963	3	99.68	99.02
Streptococcus sanguinis	0.81	686	1	99.68	99.37
Haemophilus parainfluenzae	0.26	223	2	99.68	99.04
Streptococcus mitis	0.12	100	1	99.04	99.03
BLAST against "clean" CF pathogens database including clusters < 20
species	pct_reads	reads	clusters	max_percent	min_percent
no match	76.95	65733	169
Streptococcus salivarius*	10.82	9246	7	100	99.04
Streptococcus infantis	6.59	5627	2	99.05	99.05
Staphylococcus aureus	3.34	2849	4	99.68	99.05
Streptococcus pneumoniae/mitis	1.13	963	3	99.68	99.02
Streptococcus sanguinis	0.8	686	1	99.68	99.37
Haemophilus parainfluenzae	0.26	223	2	99.68	99.04
Streptococcus mitis	0.12	100	1	99.04	99.03
BLAST against all of RDP
species	pct_reads	reads	clusters	max_percent	min_percent
no match	32.05	32644	93
Streptococcus parasanguinis*	14.52	14790	9	100	98.05
Prevotella scopos/melaninogenica*	13.29	13536	11	100	98.1
Streptococcus salivarius*/vestibularis/thermophilus	9.08	9245	7	100	98.1
Streptococcus infantis/oralis	5.99	6104	9	99.05	98
Granulicatella adiacens*/para-adiacens*	5.7	5807	18	100	98.11
Staphylococcus aureus	2.85	2901	5	99.68	98.11
Rothia dentocariosa/mucilaginosa	2.57	2616	1	99.68	98.07
Streptococcus mitis	2	2035	2	98.41	98.09
Veillonella parvula/dispar/atypica/denticariosi	1.86	1899	7	99.7	98.11
Veillonella atypica*/dispar/parvula	1.5	1524	1	100	98.17
Oribacterium sinus*	1.47	1500	3	100	99.69
Streptococcus pseudopneumoniae/pneumoniae/mitis/oralis	1.24	1263	5	99.68	98.05
Prevotella salivae	1.15	1167	6	99.68	99.05
Prevotella oris	0.91	925	6	99.68	98.1
Streptococcus sanguinis	0.67	686	1	99.68	98.1
Prevotella melaninogenica	0.52	531	10	99.37	98.11
Solobacterium moorei*	0.46	465	1	100	98.39
Gemella sanguinis*	0.45	462	3	100	99.38
Veillonella dispar*/parvula*/denticariosi	0.29	295	2	100	98.14
Rothia dentocariosa	0.23	233	2	99.68	99.04
Haemophilus parainfluenzae	0.22	223	2	99.68	98.07
Lactobacillus gasseri/taiwanensis/johnsonii	0.15	151	1	99.12	98.14
Campylobacter concisus	0.11	115	1	98.7	98.06
Lactobacillus crispatus	0.11	109	3	99.4	98.1
Veillonella parvula/dispar/atypica/denticariosi/tobetsuensis	0.1	105	2	99.7	98.18
Lactobacillus vaginalis	0.1	101	1	99.71	98.5
Rothia mucilaginosa	0.07	72	4	99.36	98.08
Streptococcus oralis	0.05	51	3	99.36	98.09
Atopobium parvulum	0.04	42	1	99.02	99.02
Campylobacter gracilis*	0.04	39	1	100	99.35
Streptococcus salivarius	0.04	37	2	98.11	98.11
Lactobacillus iners	0.03	30	1	99.71	99.41
Prevotella histicola*	0.03	30	1	100	99.37
Catonella morbi	0.02	23	1	99.08	98.78
Eubacterium saburreum	0.02	20	1	98.46	98.46
Scardovia wiggsiae	0.02	17	1	99.35	99.03
Fusobacterium periodonticum/nucleatum	0.02	17	1	99.66	98.31
[Eubacterium] infirmum	0.01	15	1	99.69	99.38
Streptococcus salivarius/thermophilus	0.01	14	1	99.37	98.73
2.2.27 CF36
clinical workup
result_type	reported_result	lab notes
culture	4+ Staphylococcus aureus, coagulase positive colony type No.1
culture	2+ Pseudomonas aeruginosa colony type No.1
culture	1+ Presumptive mucoid Pseudomonas aeruginosa colony type No.2
culture	3+ Staphylococcus aureus, coagulase positive colony type No.2
culture	2+ Contaminating oro-pharyngeal flora
sanger	Staphylococcus aureus
BLAST against "clean" CF pathogens database
species	pct_reads	reads	clusters	max_percent	min_percent
Staphylococcus aureus	94.62	34593	17	99.68	99.04
no match	3.02	1104	20
Streptococcus salivarius*	0.83	304	1	100	99.05
Streptococcus parasanguinis	0.65	238	2	99.37	99.05
Pseudomonas aeruginosa*	0.4	147	1	100	100
Streptococcus mitis	0.14	51	1	99.04	99.03
Streptococcus sanguinis	0.12	44	1	99.68	99.37
Streptococcus intermedius	0.12	43	1	99.38	99.37
Streptococcus pneumoniae/mitis	0.1	37	1	99.68	99.04
BLAST against "clean" CF pathogens database including clusters < 20
species	pct_reads	reads	clusters	max_percent	min_percent
Staphylococcus aureus*	93.94	34890	41	100	99.04
no match	3.64	1352	38
Streptococcus salivarius*	0.85	317	2	100	99.05
Streptococcus parasanguinis	0.64	238	2	99.37	99.05
Pseudomonas aeruginosa*	0.4	147	1	100	100
Streptococcus mitis	0.17	63	2	99.05	99.03
Streptococcus sanguinis	0.12	44	1	99.68	99.37
Streptococcus intermedius	0.12	43	1	99.38	99.37
Streptococcus pneumoniae/mitis	0.1	37	1	99.68	99.04
Haemophilus parainfluenzae	0.03	10	1	99.36	99.04
BLAST against all of RDP
species	pct_reads	reads	clusters	max_percent	min_percent
Staphylococcus aureus*	92.37	35056	48	100	98.1
no match	2.03	769	14
Streptococcus salivarius*/vestibularis/thermophilus	0.84	317	2	100	98.42
Streptococcus parasanguinis	0.76	289	4	99.68	98.1
Veillonella atypica*/dispar/parvula	0.45	171	1	100	98.17
Pseudomonas aeruginosa*	0.39	147	1	100	100
Granulicatella adiacens*/para-adiacens*	0.38	145	3	100	98.13
Fusobacterium periodonticum*/nucleatum*	0.28	108	2	100	98.31
Streptococcus pseudopneumoniae/pneumoniae/mitis/oralis	0.26	100	3	99.68	98.05
Gemella sanguinis*	0.25	94	1	100	100
Veillonella parvula/dispar/atypica/denticariosi	0.23	89	1	99.69	98.11
Prevotella nigrescens*	0.22	83	1	100	99.05
Streptococcus mitis/oralis	0.18	69	1	99.36	98.09
Prevotella scopos/melaninogenica*	0.15	57	1	100	98.42
Streptococcus oralis	0.12	44	1	99.05	98.42
Streptococcus sanguinis	0.12	44	1	99.68	98.1
Streptococcus intermedius	0.11	43	1	99.38	98.46
Streptococcus oralis/mitis/infantis/australis	0.1	39	1	98.4	98.03
Campylobacter concisus	0.1	37	1	99.03	98.38
Prevotella pallens	0.08	31	1	99.37	98.41
Veillonella dispar/parvula*/denticariosi	0.07	26	1	100	98.14
Treponema medium	0.06	23	2	99.04	98.11
Oribacterium sinus	0.06	22	1	99.38	99.38
Prevotella loescheii;Candidatus Prevotella conceptionensis	0.05	19	1	99.05	98.42
Veillonella parvula/atypica	0.05	19	1	98.76	98.18
Streptococcus infantis	0.05	18	1	98.1	98.01
Abiotrophia defectiva	0.04	17	1	99.07	98.14
Rothia mucilaginosa	0.04	15	1	99.68	98.71
Dialister invisus	0.04	14	1	99.7	98.8
Megasphaera micronuciformis*	0.04	14	1	100	99.7
Prevotella oris	0.03	11	1	99.68	99.37
Haemophilus parainfluenzae	0.03	10	1	99.36	98.39
Prevotella salivae	0.03	10	1	99.05	99.05
2.2.28 CF37
clinical workup
result_type	reported_result	lab notes
culture	1+ Pseudomonas aeruginosa colony type No.1
culture	1+ Pseudomonas aeruginosa colony type No.2
culture	1+ Staphylococcus aureus, small colony variant
culture	4+ Contaminating oro-pharyngeal flora
sanger	Haemophilus influenzae
BLAST against "clean" CF pathogens database
species	pct_reads	reads	clusters	max_percent	min_percent
Haemophilus influenzae	80.57	68759	42	99.68	99.03
no match	18.69	15947	61
Streptococcus salivarius	0.48	410	1	99.68	99.05
Streptococcus pneumoniae/mitis	0.16	134	1	99.68	99.04
Staphylococcus aureus	0.05	43	1	99.68	99.37
Haemophilus parainfluenzae*	0.05	43	1	100	99.04
BLAST against "clean" CF pathogens database including clusters < 20
species	pct_reads	reads	clusters	max_percent	min_percent
Haemophilus influenzae	80.1	69637	109	99.68	99.03
no match	19.17	16666	118
Streptococcus salivarius	0.47	410	1	99.68	99.05
Streptococcus pneumoniae/mitis	0.15	134	1	99.68	99.04
Staphylococcus aureus	0.05	43	1	99.68	99.37
Haemophilus parainfluenzae*	0.05	43	1	100	99.04
BLAST against all of RDP
species	pct_reads	reads	clusters	max_percent	min_percent
Haemophilus influenzae	89.02	80039	161	99.68	98.07
no match	4.51	4053	49
Prevotella histicola*	2.69	2421	3	100	98.74
Streptococcus parasanguinis	0.85	762	2	99.37	98.1
Streptococcus oralis	0.55	498	5	99.04	98.09
Streptococcus salivarius/vestibularis/thermophilus	0.46	410	1	99.68	99.05
Streptococcus infantis	0.34	305	1	98.73	98.01
Veillonella atypica*/dispar/parvula	0.31	275	1	100	98.17
Prevotella nanceiensis*	0.3	274	1	100	99.36
Streptococcus pseudopneumoniae/pneumoniae/mitis/oralis	0.2	183	2	99.68	98.05
Granulicatella adiacens/para-adiacens	0.14	126	2	99.69	98.12
Rothia dentocariosa/mucilaginosa	0.13	114	1	99.68	98.07
Prevotella salivae	0.11	100	2	99.68	98.73
Veillonella parvula/dispar/atypica/denticariosi	0.1	88	3	99.69	98.11
Oribacterium sinus*	0.09	80	2	100	99.07
Haemophilus parainfluenzae*	0.05	43	1	100	98.08
Staphylococcus aureus	0.05	43	1	99.68	99.37
Streptococcus sanguinis	0.03	31	1	98.73	98.1
Fusobacterium periodonticum*/nucleatum	0.03	27	1	100	98.31
Prevotella tannerae	0.03	24	1	98.74	98.11
Catonella morbi	0.01	13	1	99.08	98.78
2.2.29 CF38
clinical workup
result_type	reported_result	lab notes
culture	1+ Staphylococcus aureus
culture	2+ Burkholderia multivorans
culture	4+ Contaminating oro-pharyngeal flora
sanger	No diagnosis (multiple templates)
BLAST against "clean" CF pathogens database
species	pct_reads	reads	clusters	max_percent	min_percent
no match	57.56	6686	46
Burkholderia multivorans*/vietnamiensis*/cepacia*/gladioli	21.64	2514	1	100	99.02
Streptococcus salivarius*	10.09	1172	3	100	99.04
Streptococcus parasanguinis	5.66	657	2	99.37	99.05
Streptococcus pneumoniae/mitis*	1.46	170	2	100	99.04
Streptococcus mitis	1.35	157	1	99.37	99.36
Streptococcus sanguinis	1.03	120	1	99.68	99.37
Burkholderia multivorans/vietnamiensis/cepacia	0.37	43	1	99.03	99.02
Streptococcus anginosus	0.35	41	1	99.38	99.38
Streptococcus infantis	0.28	33	1	99.68	99.68
Streptococcus intermedius	0.2	23	1	99.69	99.68
BLAST against "clean" CF pathogens database including clusters < 20
species	pct_reads	reads	clusters	max_percent	min_percent
no match	57.94	6863	61
Burkholderia multivorans*/vietnamiensis*/cepacia*/gladioli	21.34	2528	2	100	99
Streptococcus salivarius*	10.08	1194	5	100	99.04
Streptococcus parasanguinis	5.55	657	2	99.37	99.05
Streptococcus pneumoniae/mitis*	1.44	170	2	100	99.04
Streptococcus mitis	1.33	157	1	99.37	99.36
Streptococcus sanguinis	1.01	120	1	99.68	99.37
Burkholderia multivorans/vietnamiensis/cepacia	0.36	43	1	99.03	99.02
Streptococcus anginosus	0.35	41	1	99.38	99.38
Streptococcus infantis	0.28	33	1	99.68	99.68
Streptococcus intermedius	0.19	23	1	99.69	99.68
Haemophilus influenzae	0.13	15	1	99.36	99.04
BLAST against all of RDP
species	pct_reads	reads	clusters	max_percent	min_percent
Burkholderia arboris*/pyrrocinia*/vietnamiensis*/cenocepacia*/stabilis*/glumae/plantarii*/multivorans*/gladioli/anthina*/ambifaria*/cepacia*	19.59	2571	3	100	98.38
Streptococcus parasanguinis	15.84	2079	9	99.68	98.05
no match	11.26	1477	10
Streptococcus salivarius*/vestibularis/thermophilus	9.1	1194	5	100	98.73
Veillonella parvula*/dispar/atypica/denticariosi	7.15	938	9	100	98.14
Granulicatella adiacens*/para-adiacens*	6.19	812	6	100	98.13
Veillonella parvula/dispar/atypica/denticariosi/tobetsuensis	4.76	624	2	99.7	98.14
Streptococcus infantis	3.4	446	4	99.68	98.1
Gemella sanguinis*	3.34	438	3	100	99.06
Streptococcus oralis	3.19	419	2	99.68	98.1
Streptococcus pseudopneumoniae/pneumoniae/mitis*/oralis*	2.49	327	3	100	98.05
Veillonella atypica*/dispar/parvula	2.2	289	3	100	98.15
Prevotella scopos/melaninogenica*	2.14	281	2	100	98.42
Prevotella melaninogenica	2	262	1	98.11	98.11
Oribacterium sinus	1.81	237	5	99.69	98.45
Streptococcus sanguinis	0.91	120	1	99.68	98.1
Prevotella salivae	0.72	95	1	99.05	99.05
Porphyromonas catoniae	0.69	91	1	98.11	98.11
Streptococcus australis	0.48	63	1	98.03	98.03
Veillonella dispar/parvula/denticariosi	0.37	49	2	99.7	98.14
Solobacterium moorei*	0.32	42	1	100	98.39
Streptococcus anginosus	0.31	41	1	99.38	98.77
Campylobacter concisus*	0.3	40	1	100	98.64
Megasphaera micronuciformis	0.25	33	1	99.7	99.4
Atopobium parvulum	0.24	32	1	99.67	99.67
Gemella haemolysans	0.24	31	1	98.75	98.75
Streptococcus constellatus/intermedius	0.18	23	1	99.69	98.15
Streptococcus mitis	0.16	21	1	98.41	98.1
Rothia dentocariosa/mucilaginosa	0.16	21	1	99.68	98.07
Haemophilus influenzae	0.11	15	1	99.36	99.04
Burkholderia arboris/pyrrocinia/vietnamiensis/cenocepacia/stabilis/plantarii/multivorans/anthina/ambifaria/cepacia	0.08	10	1	98.05	98.02
2.2.30 CF39
clinical workup
result_type	reported_result	lab notes
culture	4+ Presumptive mucoid Pseudomonas aeruginosa
culture	3+ Staphylococcus aureus, coagulase positive
culture	4+ Pseudomonas aeruginosa
culture	3+ Presumptive mucoid Pseudomonas aeruginosa colony type No.2
culture	3+ Contaminating oro-pharyngeal flora
sanger	Pseudomonas aeruginosa
BLAST against "clean" CF pathogens database
species	pct_reads	reads	clusters	max_percent	min_percent
Pseudomonas aeruginosa*	88.79	86854	52	100	99.02
no match	5.39	5268	32
Staphylococcus aureus	4.54	4444	5	99.68	99.05
Streptococcus infantis	0.53	518	1	99.05	99.05
Streptococcus parasanguinis	0.36	356	1	99.37	99.05
Serratia marcescens*	0.21	202	2	100	99
Streptococcus intermedius	0.08	78	1	99.38	99.37
Streptococcus mitis	0.06	60	1	99.05	99.02
Streptococcus australis	0.04	41	1	99.37	99.37
BLAST against "clean" CF pathogens database including clusters < 20
species	pct_reads	reads	clusters	max_percent	min_percent
Pseudomonas aeruginosa*	88.5	87815	125	100	99.02
no match	5.72	5678	64
Staphylococcus aureus*	4.49	4454	6	100	99.05
Streptococcus infantis	0.52	518	1	99.05	99.05
Streptococcus parasanguinis	0.36	356	1	99.37	99.05
Serratia marcescens*	0.2	202	2	100	99
Streptococcus intermedius	0.08	78	1	99.38	99.37
Streptococcus mitis	0.07	71	2	99.36	99.02
Streptococcus australis	0.04	41	1	99.37	99.37
Burkholderia multivorans/vietnamiensis/cepacia/gladioli	0.01	12	1	99.68	99
BLAST against all of RDP
species	pct_reads	reads	clusters	max_percent	min_percent
Pseudomonas aeruginosa*	88.99	88391	142	100	98.03
Staphylococcus aureus*	4.73	4699	9	100	98.42
Granulicatella adiacens*/para-adiacens*	1.55	1538	7	100	98.15
Streptococcus parasanguinis	1.03	1025	2	99.68	98.1
no match	0.7	691	18
Streptococcus infantis	0.52	518	1	99.05	98.33
Gemella sanguinis*	0.33	329	3	100	99.38
Veillonella parvula/dispar/atypica/denticariosi	0.33	325	3	99.7	98.18
Oribacterium sinus	0.31	309	4	99.69	98.45
[truncated: 2,199 more rows]
