# Supplementary material for: Rapid 16S rRNA Next-Generation Sequencing of Polymicrobial Clinical Samples for Diagnosis of Complex Bacterial Infections
Source: PLoS One. 2013 May 29;8(5):e65226. doi: 10.1371/journal.pone.0065226 (PMC3666980; doi:10.1371/journal.pone.0065226)
Supplement: Table S3 — Putative genus-level classification of consensus sequences from brain abscesses and lymph node biopsy that were unassigned at the species-level. (XLSX) [file pone.0065226.s011.xlsx]

## Sheet: clinical_classification_summary
specimen	target_rank	tax_name	clusters	reads	pct_reads	min_percent	max_percent	min_coverage	max_coverage
brain1	species	Streptococcus constellatus/intermedius	5	11269	36.89	99.07	99.69	100	100
	species	Porphyromonas endodontalis	11	8728	28.57	99.05	99.68	100	100
	species	Streptococcus constellatus	2	52	0.17	99.07	99.08	100	100
	genus	Prevotella	3	7703	25.22	95.27	95.58	100	100
	genus	Porphyromonas	20	2226	7.29	96.84	98.74	99.04	100
	genus	no match >= 95.0%	4	527	1.73	90.16	94.98	99.05	100
	genus	Streptococcus	1	40	0.13	97.5	98.78	97.86	100
brain2	species	Staphylococcus epidermidis	9	6874	99.01	99.01	99.68	95.89	100
	species	Comamonas testosteroni*	1	48	0.69	99.31	100	95.05	100
	genus	Staphylococcus	1	21	0.3	95.6	98.74	95.9	100
brain3	species	Prevotella oris	4	4379	31.62	99.04	99.37	99.05	100
	species	Porphyromonas endodontalis	3	2161	15.6	99.04	99.68	99.04	100
	species	Streptococcus constellatus/intermedius	1	870	6.28	99.08	99.69	100	100
	species	Peptostreptococcus stomatis	2	286	2.06	99.12	99.41	100	100
	genus	Fusobacterium	17	4757	34.34	95.03	98.38	96.77	100
	genus	Prevotella	10	699	5.05	97.47	98.75	98.44	100
	genus	Porphyromonas	4	509	3.67	97.45	98.74	99.04	100
	genus	no match >= 95.0%	1	142	1.03	90	90.97	99.37	99.37
	genus	Peptostreptococcus	1	48	0.35	98.53	98.53	100	100
brain4	species	Porphyromonas endodontalis	12	4459	25.06	99.05	99.68	100	100
	species	Streptococcus constellatus/intermedius	2	1905	10.71	99.07	99.69	100	100
	species	Streptococcus constellatus	1	21	0.12	99.08	99.08	100	100
	genus	Prevotella	5	8508	47.81	95.27	95.6	100	100
	genus	Porphyromonas	14	2360	13.26	97.44	98.74	99.04	100
	genus	no match >= 95.0%	5	542	3.05	90.4	94.97	95.24	100
lymphnode	species	Veillonella atypica/dispar/parvula	1	2742	24.68	99.05	99.7	96.35	100
	species	Fusobacterium periodonticum*	2	1994	17.95	99.32	100	99.32	100
	species	Veillonella denticariosi/dispar/parvula*	3	1226	11.04	99.07	100	98.18	100
	species	Streptococcus oralis	2	657	5.91	99.36	99.36	100	100
	species	Prevotella nanceiensis*	3	607	5.46	99.04	100	95.51	100
	species	Campylobacter concisus	1	343	3.09	99.03	99.03	100	100
	species	Streptococcus parasanguinis	1	304	2.74	99.05	99.68	100	100
	species	Peptostreptococcus stomatis	1	274	2.47	99.41	99.71	100	100
	species	Streptococcus salivarius/thermophilus/vestibularis	1	232	2.09	99.05	99.68	98.74	100
	species	Veillonella dispar*/parvula*	2	185	1.67	99.07	100	98.17	100
	species	Streptococcus mitis/oralis/pneumoniae/pseudopneumoniae	2	80	0.72	99.03	99.68	98.08	100
	species	Rothia mucilaginosa	1	74	0.67	99.04	99.68	95.82	100
	species	Haemophilus parainfluenzae	1	54	0.49	99.04	99.36	100	100
	species	Gemella haemolysans	1	36	0.32	99.69	99.69	100	100
	species	Streptococcus constellatus*/intermedius	1	36	0.32	99.38	100	100	100
	species	Oribacterium sinus	1	29	0.26	99.69	99.69	100	100
	species	Veillonella atypica	1	28	0.25	99.69	99.69	98.18	98.78
	species	Fusobacterium nucleatum/periodonticum	1	25	0.23	99.32	99.66	98.99	100
	species	Gemella sanguinis	1	25	0.23	99.38	99.69	100	100
	species	Capnocytophaga sputigena	1	25	0.23	99.02	99.67	100	100
	species	Streptococcus infantis	1	23	0.21	99.05	99.05	100	100
	species	Prevotella melaninogenica	1	23	0.21	99.05	99.68	100	100
	genus	Streptococcus	3	977	8.79	95.15	98.73	95.25	100
	genus	Porphyromonas	3	635	5.72	96.85	98.11	100	100
	genus	Eubacterium	3	300	2.7	95.2	96.93	100	100
	genus	Neisseria	2	114	1.03	95.53	98.7	98.71	100
	genus	Granulicatella	1	37	0.33	95.82	98.72	97.18	100
	genus	Oribacterium	1	25	0.23	98.76	98.76	100	100
